# Supplementary material
Source: PubMed Central journal article supplement (PMC5502637)
Supplement: pnas.1705016114.sapp.pdf [file pnas.1705016114.sapp.pdf]

## Supporting Information

### SI Materials and Methods

**Construction of Plasmids for Protein Expression in *E. coli*.** Individual genes were PCR amplified from genomic DNA and cloned into pET24b, pETDuet, or pCDFDuet-1 by restriction enzyme digestion (Thermo Scientific) and ligation with Quick T4 DNA ligase (New England Biolabs). All primers used are listed in Table S3. Plasmids were isolated using a QIAprep Spin Miniprep Kit (Qiagen) and confirmed by DNA Sequencing (UC Berkeley DNA Sequencing Facility).

**Identification of *E. coli-scoA-E* and *E. coli-mmaA-E* metabolites through untargeted, comparative metabolomics.** *E. coli* BAP1 strain harnessing plasmids containing either *scoA-E* or *mmaA-E* were grown in triplicate along with a control harnessing empty vectors. 30 mL cultures were grown at 37°C in LB containing appropriate antibiotics until OD<sub>600</sub> 0.5 and induced with 0.5 mM IPTG. For *E. coli-mmaA-E*, decenoic acid or dodecenoic acid was fed to a final concentration of 1 mM at the time of induction. After induction, the temperature was decreased to 20°C, and compound production was allowed to proceed for approximately 48 h. The entire culture (both pellet and supernatant) was extracted with an equal amount of chloroform. The organic extract was dried and redissolved in methanol and analyzed via liquid chromatography-high resolution mass spectroscopy (LC-HRMS). LC-HRMS analysis was normally performed using an Agilent Technologies 6520 Accurate-Mass Q-TOF LC-MS instrument and an Agilent Eclipse Plus C18 column (4.6 x 100 mm). A linear gradient of 2-98% CH<sub>3</sub>CN (vol/vol) over 45 min in H<sub>2</sub>O with 0.1% formic acid (vol/vol) at a flow rate of 0.5 mL/min was used. XCMS software was used for untargeted metabolomic comparisons of extracts from strains containing *scoA-E* or *mmaA-E* to the empty vector control. In a typical small-scale metabolomics analysis, for compounds **1** and **2**, A linear gradient of 10-50% CH<sub>3</sub>CN (vol/vol) over 12 min in H<sub>2</sub>O with 0.1% (vol/vol) formic acid at a flow rate of 0.5 mL/min was used. For compounds **6** and **7**, a linear gradient of 50-98% CH<sub>3</sub>CN (vol/vol) over 12 min in H<sub>2</sub>O with 0.1% (vol/vol) formic acid at a flow rate of 0.5 mL/min, or a linear gradient of 10 to 98% over 30 min followed by 10 min at 98%. HRMS/MS analysis was conducted using targeted MS/MS with collision energy of 5-30V.

**Large-scale Production, Purification, and Characterization of 1 and 2.** A total of 40 L (40 ×1-L) of the *E. coli-scoA-E* was cultured in LB with appropriate antibiotics. The cultures were inoculated with 10 mL of a seed culture and grown at 37°C to OD600 ≈ 0.5 – 0.7 before induction with 0.5 mM IPTG. After induction, the temperature was dropped to 20°C, and compound production was allowed to proceed for approximately two days. The cells were pelleted by centrifugation (6371 × g, 15 min) and compounds **1** and **2** were extracted from the culture medium using two volumes of chloroform. The solvent was removed by rotary evaporation, and the combined residue was re-dissolved in methanol. Purification by HPLC was conducted using an Agilent 1260 HPLC with a C18 Vydac 218TP1022 column 10µm (22 x 250 mm) using a linear gradient of 5-30% CH<sub>3</sub>CN (vol/vol) over 50 min in H<sub>2</sub>O without formic acid at a flow rate of 5 mL/min and an injection of 1 mL. Fractions were screened using LC-HRMS using an Agilent Eclipse Plus C18 column (4.6 x 100 mm) and a linear gradient of 10-50% CH<sub>3</sub>CN (vol/vol) over 12 min in H<sub>2</sub>O with 0.1% (vol/vol) formic acid at a flow rate of 0.5 mL/min. Fractions containing **1** were combined and those containing **2** were also combined, separately. Further HPLC purification was conducted using a C18 Vydac 218TP1022 column 10µm (22 x 250 mm) and an isocratic program of 15% CH<sub>3</sub>CN (vol/vol) in H<sub>2</sub>O at a flow rate of 5 mL/min. Fractions containing **1** and **2** were again determined by LC-HRMS and combined, separately. A final round of HPLC purification was conducted using an Inertsil ODS-4 column (6 mm x 250 mm) using an isocratic program of 23% CH<sub>3</sub>CN (vol/vol) in H<sub>2</sub>O at a flow rate of 1 mL/min. The resulting 3 mg of purified **1** and 0.5 mg of purified **2** were dried and analyzed by LC-HRMS and NMR. NMR spectra (1D: <sup>1</sup>H, <sup>13</sup>C and 2D: HSQC, dqf-COSY, HMBC, and ROESY) were recorded on a Bruker Biospin 900 MHz spectrometer with a cryoprobe in DMSO-d<sub>6</sub> (Cambridge Isotope Laboratories).

**Overexpression and Purification of Proteins.** Expression and purification for all proteins with a His6-tag followed the same general procedure and is detailed as follows: cells were grown at 37°C in 700 mL of LB with the appropriate antibiotic to an OD600 of 0.5. The cells were then cooled on ice for 10 min and induced with 0.12 mM isopropyl-β-D-thiogalactopyranoside (IPTG) for 16 h at 16°C. Subsequently, the cells were harvested by centrifugation (6371 × g, 15 min, 4°C), resuspended in 30 mL lysis buffer (25 mM HEPES, pH 8, 0.5 M NaCl, 5 mM imidazole), and lysed by homogenization on ice. Cellular debris was removed by centrifugation

(27216 × g, 1 h, 4°C). Ni-NTA agarose resin was added to the supernatant (1.5 mL/L of culture), and the solution was nutated at 4°C for 1 h. The protein-resin mixture was loaded onto a gravity flow column, and proteins were eluted with increasing concentrations of imidazole in Buffer A (20 mM HEPES, pH 8.0). Purified proteins were concentrated and buffer exchanged into Buffer A + 10% glycerol using Amicon Ultra spin filters. Proteins were flash frozen in liquid nitrogen and stored at -80°C. The approximate proteins yields were 8 mg/L for ScoA (158 kDa), 12 mg/L for ScoB (12 kDa), 14 mg/L for ScoC (57 kDa), 40 mg/L for ScoD (19 kDa), 15 mg/L for ScoE (34 kDa), 14 mg/L for MmaA (152kDa), 7 mg/L for MmaB (10 kDa), 30 mg/L for MmaC (58 kDa), 32 mg/L for MmaD (23 kDa), and 18 mg/L for MmaE (34 kDa).

**ATP-PP<sub>i</sub> Exchange Assays.** Assays were performed in 100 μL of reaction buffer (50 mM Tris-HCl/2 mM MgCl<sub>2</sub>, pH 8) containing 5 mM ATP, 1 mM Na<sub>4</sub>[<sup>32</sup>P]-pyrophosphate (PP<sub>i</sub>) (~3 × 10<sup>6</sup> cpm/mL), 1 mM TCEP, 5 mM substrate, and 5 μM enzyme. Reactions were incubated at 25°C for 2 h, then quenched by the addition of a charcoal suspension (1.6% w/v activated charcoal, 0.1 M Na<sub>4</sub>PP<sub>i</sub>, 3.5% HClO<sub>4</sub>). Free [<sup>32</sup>P]PP<sub>i</sub> was removed by centrifugation of the sample followed by washing twice with wash solution (0.1 M Na<sub>4</sub>PP<sub>i</sub> and 3.5% HClO<sub>4</sub>). Charcoal-bound radioactivity was measured on a Beckman LS 6500 scintillation counter.

**LC-HRMS Analysis of ScoB and MmaB-bound Biosynthetic Intermediates.** Assays were performed in 50 μL of 50 mM HEPES (pH 8.0) containing 5 mM ATP, 2 mM MgCl<sub>2</sub>, 5 mM acid substrate (C4-C12), 0–50 μM of each protein. The reaction mixture was mixed gently and incubated for two hours at room temp. After incubation, 450 uL of water was added and then the mixture was filtered (0.2 μm). LC-HRMS analysis was normally performed using an Agilent Technologies 6520 Accurate-Mass Q-TOF LC-MS instrument and a Phenomenex Aeris widepore XBC18 column (250 x 21 mm) with a linear gradient of 15 to 98% CH<sub>3</sub>CN (v/v) over 21 min in H<sub>2</sub>O with 0.1% (v/v) formic acid, at a flow rate of 0.15 mL min<sup>-1</sup>. The data were analyzed using Agilent MassHunter Qualitative Analysis software using the maximum entropy deconvolution feature.

**Product Formation Assays Using ScoABC and MmaABC.** Assays were performed in 50 μL of 50 mM HEPES (pH 8.0) containing 5 mM ATP, 2 mM MgCl<sub>2</sub>, 5 mM acid substrate (C4-

C12), 0–50  $\mu\text{M}$  of each protein, 1 mM TCEP, 2 mM NADPH, and 5 mM Lys. The reaction mixture was mixed gently and incubated for two hours at room temp. After incubation, the reaction was quenched with 50  $\mu\text{L}$  MeOH and protein residues were removed by centrifugation. LC-HRMS analysis was normally performed using an Agilent Eclipse Plus C18 column (4.6  $\text{\AA}$ ~ 100 mm) with a linear gradient of 5 to 98%  $\text{CH}_3\text{CN}$  (v/v) over 30 min in  $\text{H}_2\text{O}$  with 0.1% (v/v) formic acid (for ScoABC), or 15 to 98% over 20 min followed by 10 min at 98%  $\text{CH}_3\text{CN}$  (v/v) in  $\text{H}_2\text{O}$  with 0.1% (v/v) formic acid (for MmaABC), at a flow rate of 0.5  $\text{mL min}^{-1}$ .

**Biochemical Assays of ScoBCD and MmaBCD.** Assays were performed in 50  $\mu\text{L}$  of 50 mM HEPES (pH 8.0) containing 5 mM ATP, 2 mM  $\text{MgCl}_2$ , 5 mM acid substrate (C4-C12), 0–50  $\mu\text{M}$  of each protein, and 200 mM Gly. For labeling experiments,  $[2\text{-}^{13}\text{C}]\text{Gly}$ ,  $[^{15}\text{N}]\text{Gly}$ , or  $[2\text{-}^{13}\text{C}, ^{15}\text{N}]\text{Gly}$  was used. The reaction mixture was mixed gently and incubated at room temp. At various time points, the reaction was quenched with 50  $\mu\text{L}$  MeOH and incubated on ice for 10 minutes. The protein residues were pelleted by centrifugation for 10 min at 4°C and the supernatant was used for LC-HRMS analysis. The protein pellet was then resuspended in 100  $\mu\text{L}$  of MeOH and centrifuged again and the supernatant was discarded (this process was repeated three times). The pellet was then re-dissolved in 50  $\mu\text{L}$  of 100 mM KOH and heated at 70°C for 10 min. The solution was then neutralized with 50  $\mu\text{L}$  of 100 mM HCl. The solution was spin filtered (Amicon Ultra Centrifugal Filters 3 kDa, 0.5 mL) to remove any particles and the flow-through was used for LC-HRMS analysis, which was normally performed using an Agilent Eclipse Plus C18 column (4.6  $\text{\AA}$ ~ 100 mm). For ScoBCD experiments, a linear gradient of 10 to 50%  $\text{CH}_3\text{CN}$  (v/v) over 12 min in  $\text{H}_2\text{O}$  with 0.1% (v/v) formic acid, at a flow rate of 0.5  $\text{mL min}^{-1}$  was used. For MmaBCD experiments, a linear gradient of 20 to 98%  $\text{CH}_3\text{CN}$  (v/v) over 18 min in  $\text{H}_2\text{O}$  with 0.1% (v/v) formic acid, at a flow rate of 0.5  $\text{mL min}^{-1}$  was used.

**Gene Disruption in *M. marinum* and Mutant Analysis.** Deletion of the *Mmar\_0256-0260* (*mmaA-E*) locus in *Mycobacterium marinum* strain M was performed by cloning 800-bp of the start of *Mmar0260* and end of *Mmar\_0256* on either side of the hygromycin resistance gene on pMSG360 and using homologous recombination via transduction with the temperature-sensitive mycobacteriophage phAE87, as described previously. The phage was incubated with *M. marinum* cells at an MOI of 10 for 4 h at 39°C before plating on hygromycin 7H10 plates and

growing at 30°C. The *Mmar\_0256-0260* deletion was verified by Sanger sequencing.

**ICP-OES Analyses.** Wild-type and *ΔmmaA-E* were grown in 50 mL Sauton's medium at 30°C and 105 rpm in triplicate. 15 mL of culture was harvested at late exponential phase and washed 3x with cold 1 mM EDTA. Cell pellets were dried at 100°C overnight and resuspended in 70% trace metal grade nitric acid. The cell suspensions were boiled overnight in acid-washed Pyrex Erlenmeyer flasks. Dried samples were redissolved in 5 mL 2% nitric acid prior to analysis. Standard solutions were dissolved in the same matrix. The concentration of the trace elements was determined using a Perkin Elmer 5300 DV ICP-OES at College of Natural Resources, University of California at Berkeley. The analytical precision of the measurements is better than  $\pm 2\%$  RSD.

MS and MS/MS data have been deposited to the EMBL-EBI MetaboLights (1) database (DOI: 10.1093/nar/gks1004. PubMed PMID: 23109552) with the identifier MTBLS454. The complete dataset can be accessed here <http://www.ebi.ac.uk/metabolights/MTBLS454>

#### **Reference:**

1. Haug K, *et al.* (2013) MetaboLights - an open-access general-purpose repository for metabolomics studies and associated meta-data. *Nucleic Acids Res* 41:D781-D786.

## SI Figures

*M. tuberculosis*

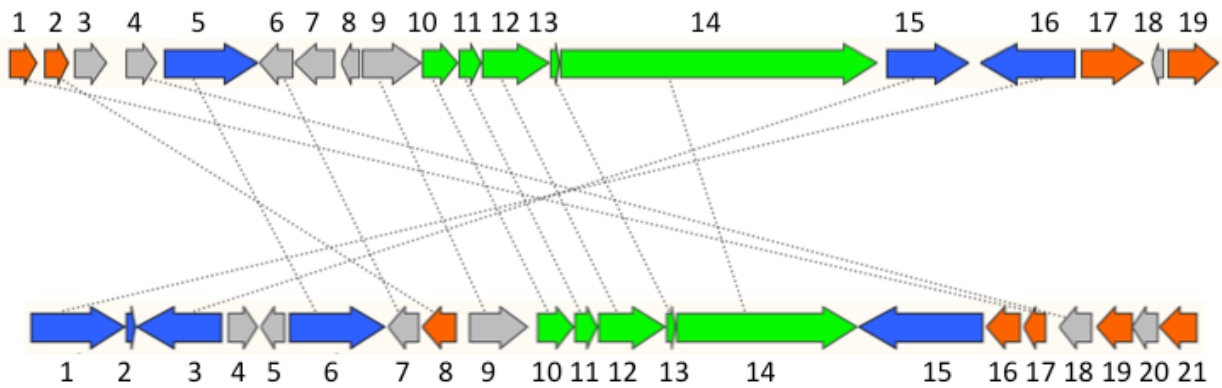

*M. marinum*

| Gene Number | Locus   | Putative Function                         |
|-------------|---------|-------------------------------------------|
| Mtb 1       | Rv0088  | Polyketide cyclase/dehydratase            |
| Mtb 2       | Rv0089  | O-methyltransferase                       |
| Mtb 3       | Rv0090  | Membrane protein                          |
| Mtb 4       | Rv0091  | MTA/SAH nucleosidase                      |
| Mtb 5       | Rv0092  | CtpA Cation-transporting P-type ATPase    |
| Mtb 6       | Rv0093  | Anti-sigma factor                         |
| Mtb 7       | Rv0094c | Membrane protein                          |
| Mtb 8       | Rv0095  | Conserved hypothetical protein            |
| Mtb 9       | Rv0096  | PPE family protein                        |
| Mtb 10      | Rv0097  | Oxidase                                   |
| Mtb 11      | Rv0098  | Thioesterase                              |
| Mtb 12      | Rv0099  | Acyl ACP ligase                           |
| Mtb 13      | Rv0100  | Acyl carrier protein                      |
| Mtb 14      | Rv0101  | Non-ribosomal peptide synthetase          |
| Mtb 15      | Rv0102  | CtaG cytochrome C oxidase assembly factor |
| Mtb 16      | Rv0103c | CtpB Cation-transporting P-type ATPase    |
| Mtb 17      | Rv0104  | cAMP dependent protein kinase             |
| Mtb 18      | Rv0105c | L28P Family of ribosomal proteins         |
| Mtb 19      | Rv0106  | Nitrile hydratase                         |

| Gene Number | Locus     | Putative Function                                            |
|-------------|-----------|--------------------------------------------------------------|
| Mma1        | Mmar_0269 | CtpB Cation-transporting P-type ATPase                       |
| Mma2        | Mmar_0268 | Metal Chaperone                                              |
| Mma3        | Mmar_0267 | CtaG cytochrome C oxidase assembly factor                    |
| Mma4        | Mmar_0266 | Secreted protein                                             |
| Mma5        | Mmar_0265 | SigC regulatory element                                      |
| Mma6        | Mmar_0264 | CtpA Cation-transporting P-type ATPase                       |
| Mma7        | Mmar_0263 | Putative Zinc Finger; anti-sigma factor                      |
| Mma8        | Mmar_0262 | O-methyltransferase                                          |
| Mma9        | Mmar_0261 | PPE family protein                                           |
| Mma10       | MmaE      | Oxidase                                                      |
| Mma11       | MmaD      | Thioesterase                                                 |
| Mma12       | MmaC      | Acyl ACP ligase                                              |
| Mma13       | MmaB      | Acyl carrier protein                                         |
| Mma14       | MmaA      | Non-ribosomal peptide synthetase                             |
| Mma15       | Mmar_0255 | mmp15 MFS                                                    |
| Mma16       | Mmar_0254 | Ketoacyl reductase                                           |
| Mma17       | Mmar_0253 | SRPBCC Superfamily (putative polyketide cyclase/dehydratase) |
| Mma18       | Mmar_0251 | MTA/SAH nucleosidase                                         |
| Mma19       | Mmar_0250 | Desaturase                                                   |
| Mma20       | Mmar_0249 | TetR transcriptional regulator                               |
| Mma21       | Mmar_0248 | Short-chain type dehydrogenase/reductase                     |

**Figure S1.** Bioinformatics analysis of *M. marinum* strain M and *M. tuberculosis* H37Rv biosynthetic gene clusters and surrounding genes. ABCDE are colored green, genes putatively related to metal transport are colored blue, putative fatty acid modification genes are colored orange, and genes with other functions are colored gray. The genes are numbered and putative functions are listed in the table. Homologous genes between the two clusters are cross-linked in the figure.

MmaA-E

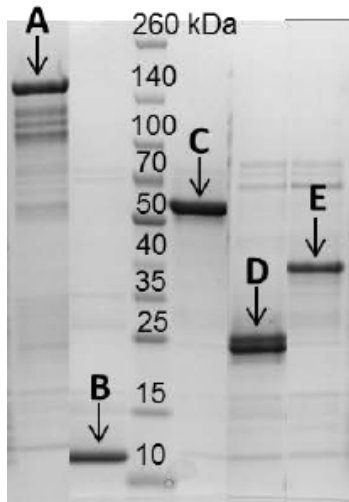

ScoA-E

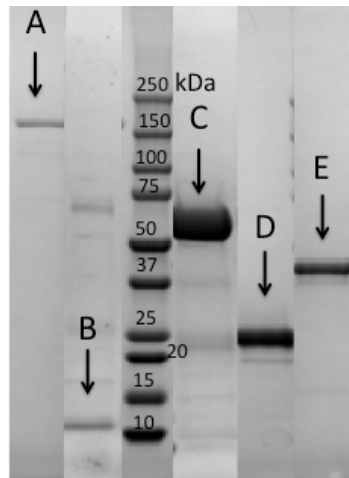

**Figure S2.** SDS-PAGE analysis of the *E. coli* purified proteins. All proteins have an *N*-terminal hexahistidine tag and were expressed as largely soluble. Criterion Tris-HCl gels (4-15% precast, Biorad) were used.



$m/z$  [M+H]<sup>+</sup>  
Obs. 365.2185  
Calc. 365.2183  
Error: 0.5 ppm

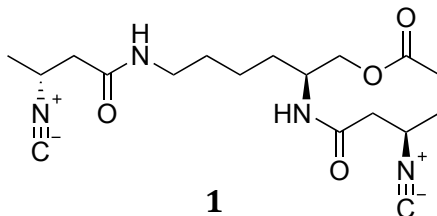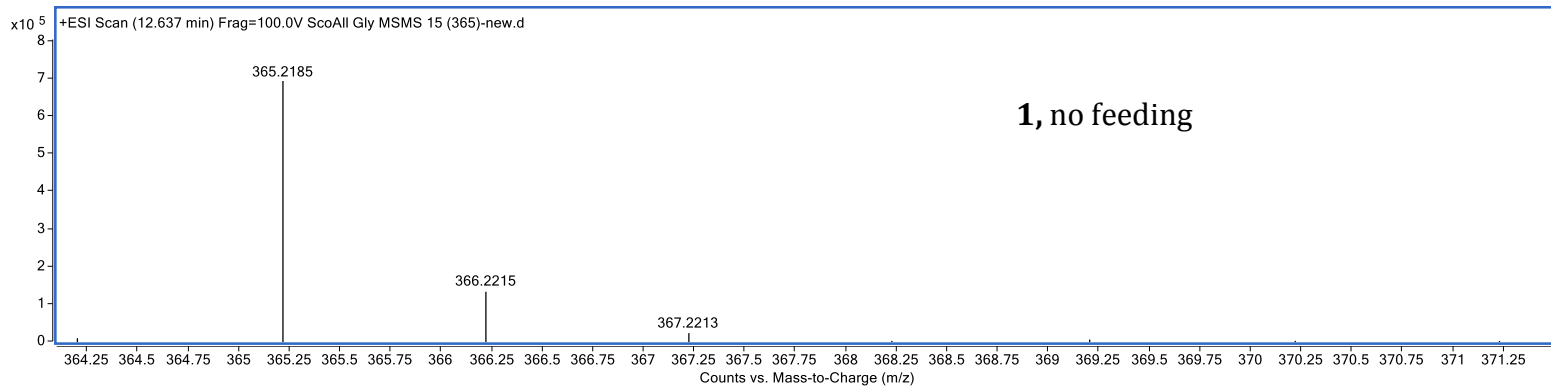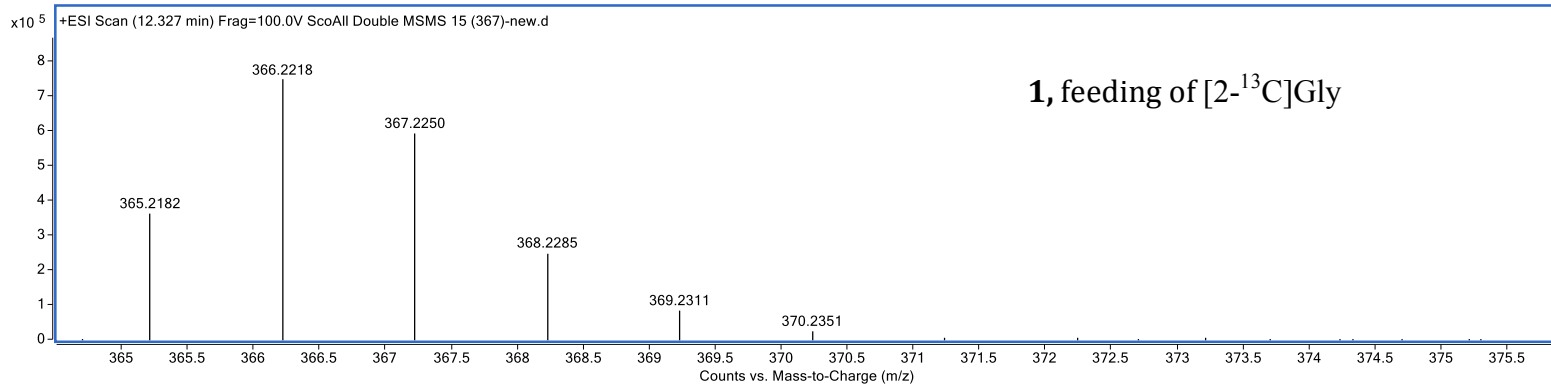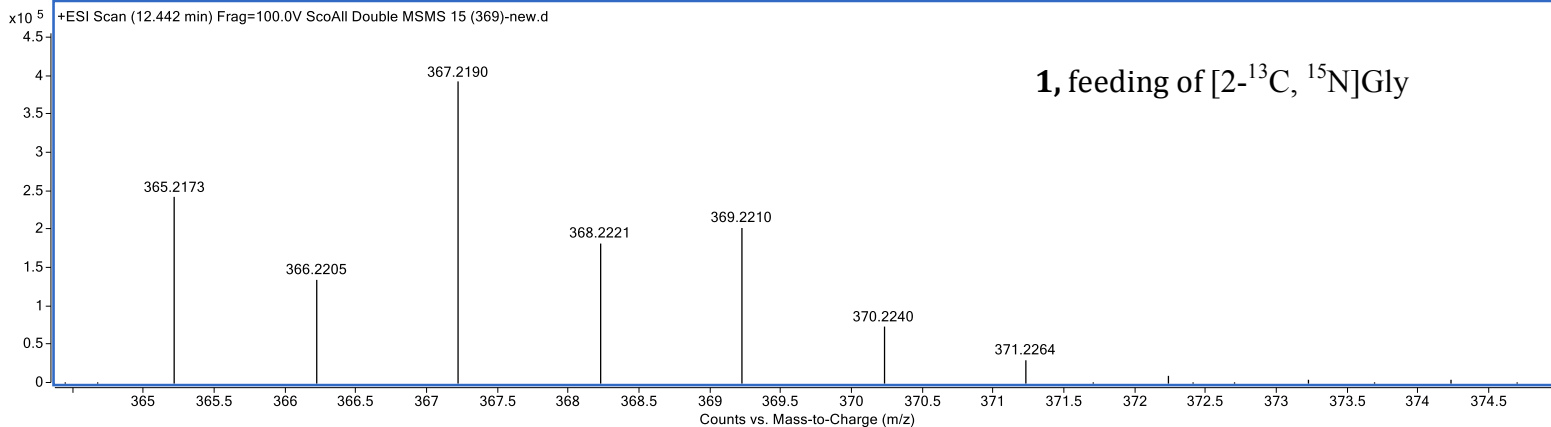

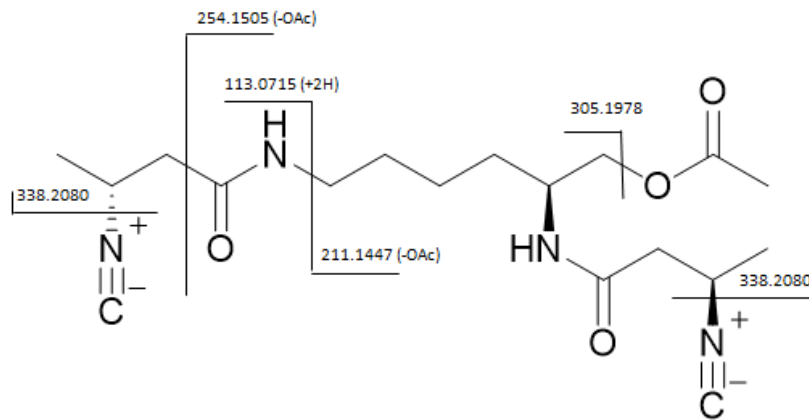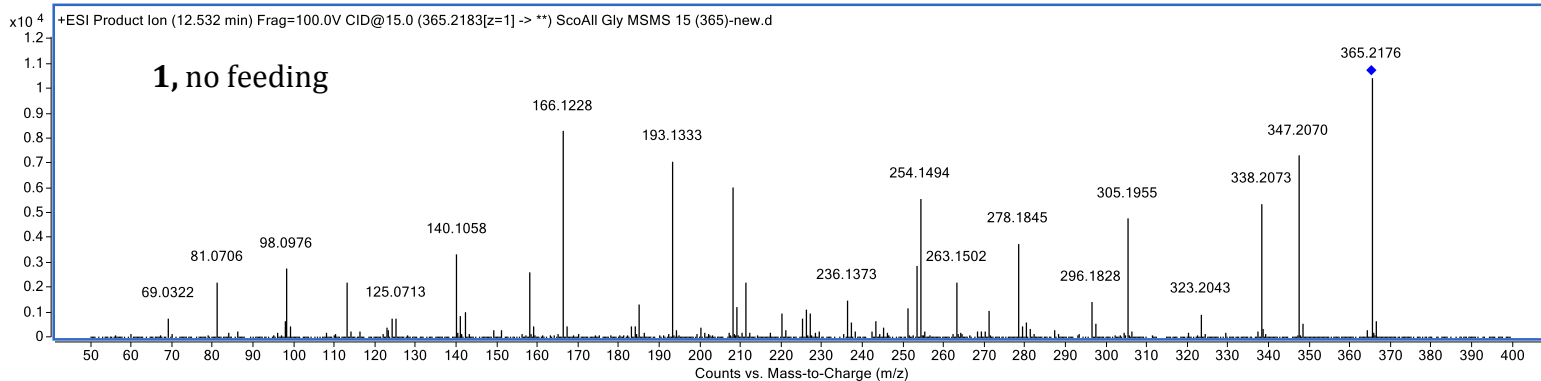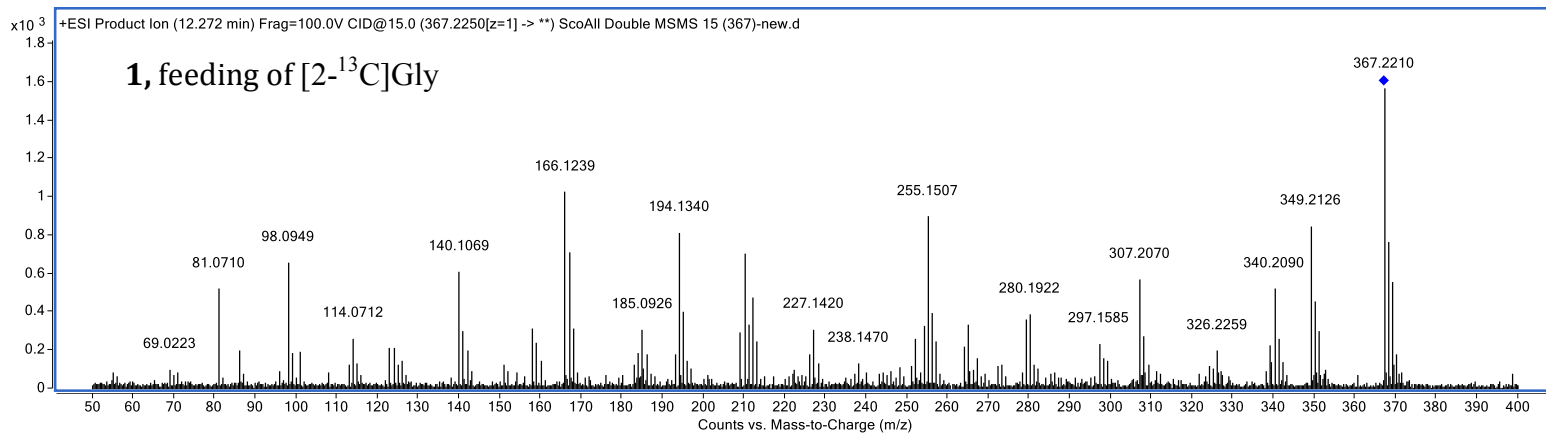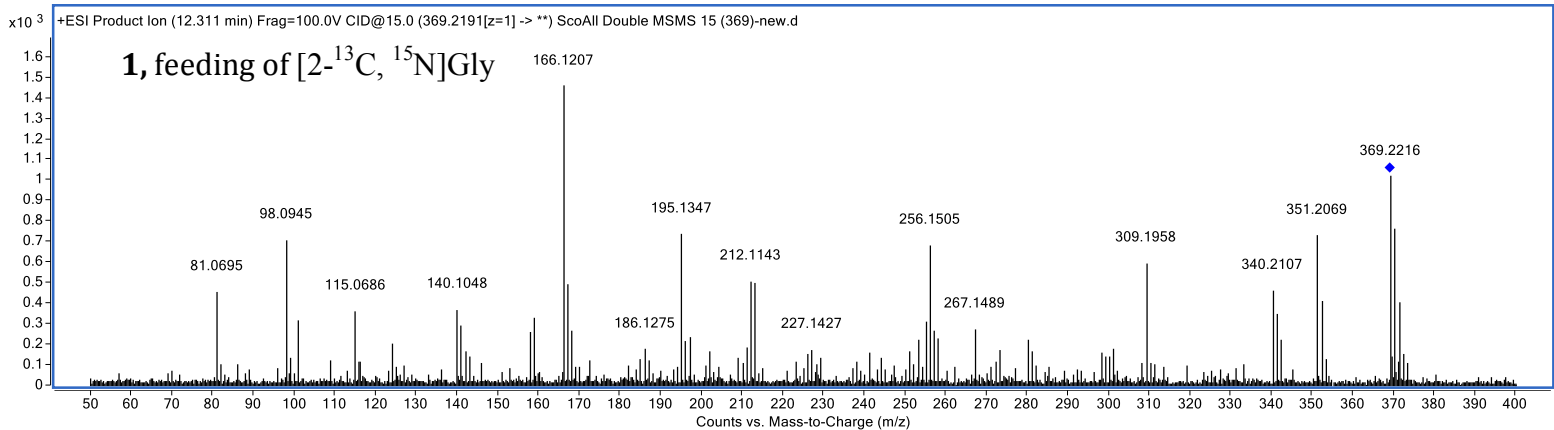

$m/z$   $[M+H]^+$   
Obs. 323.2079  
Calc. 323.2078  
Error: 0.3 ppm

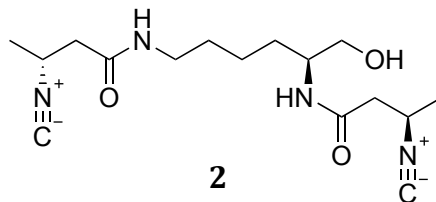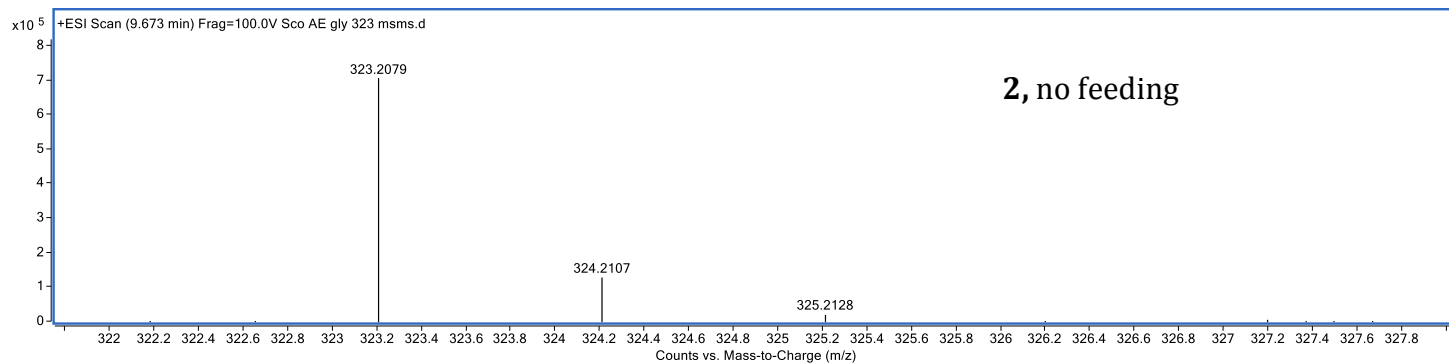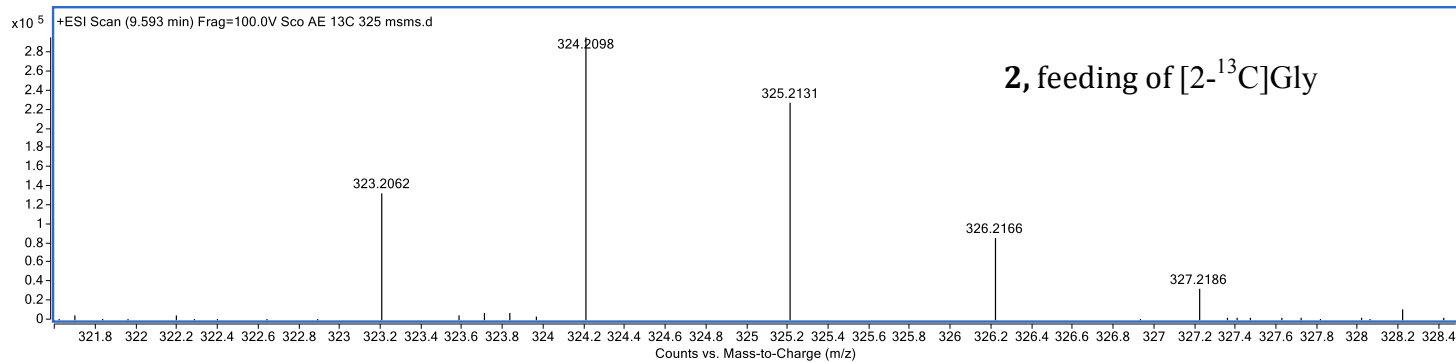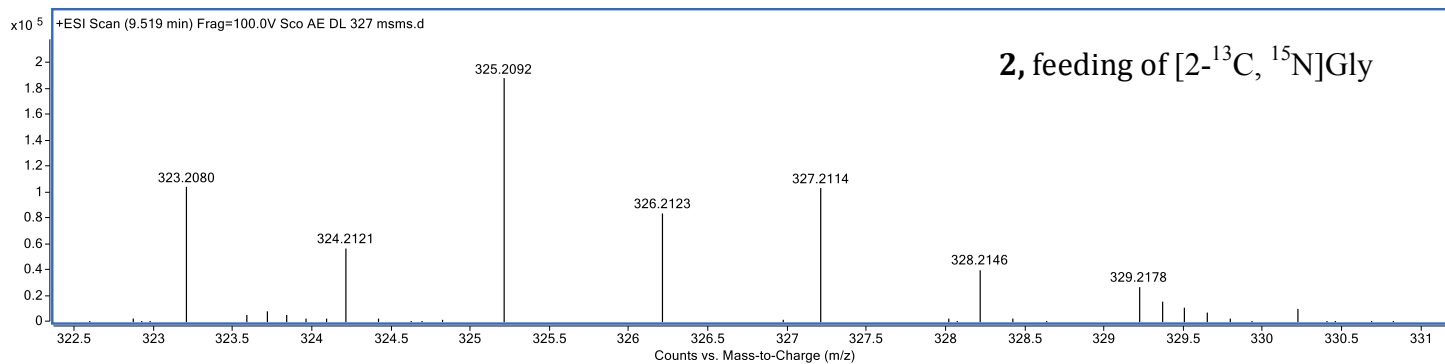

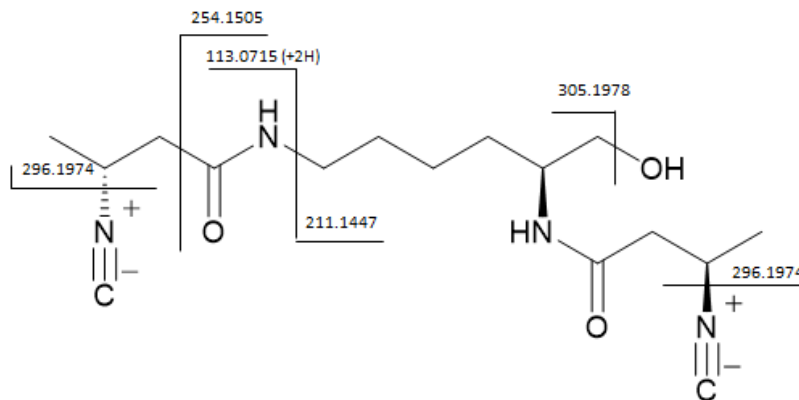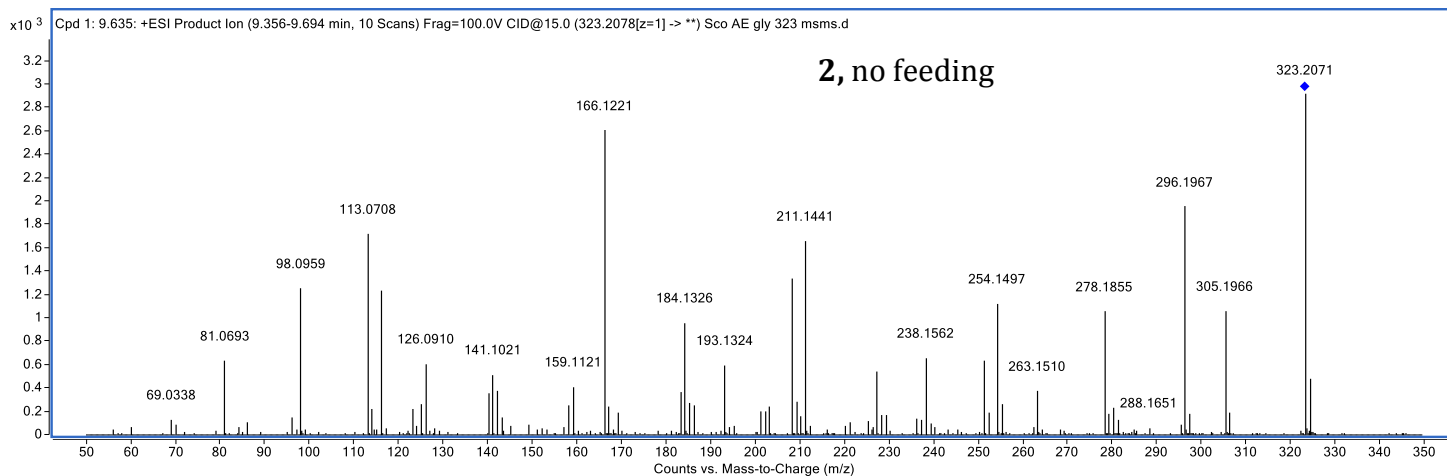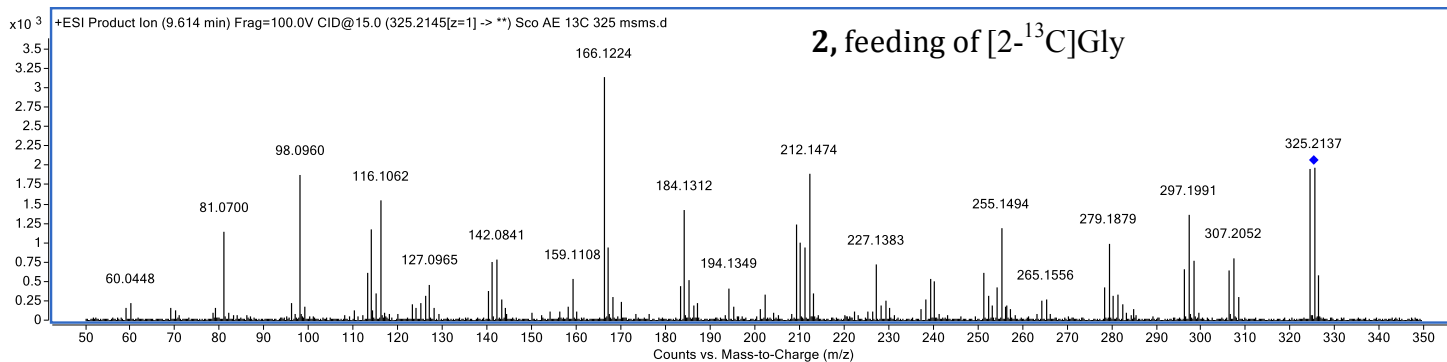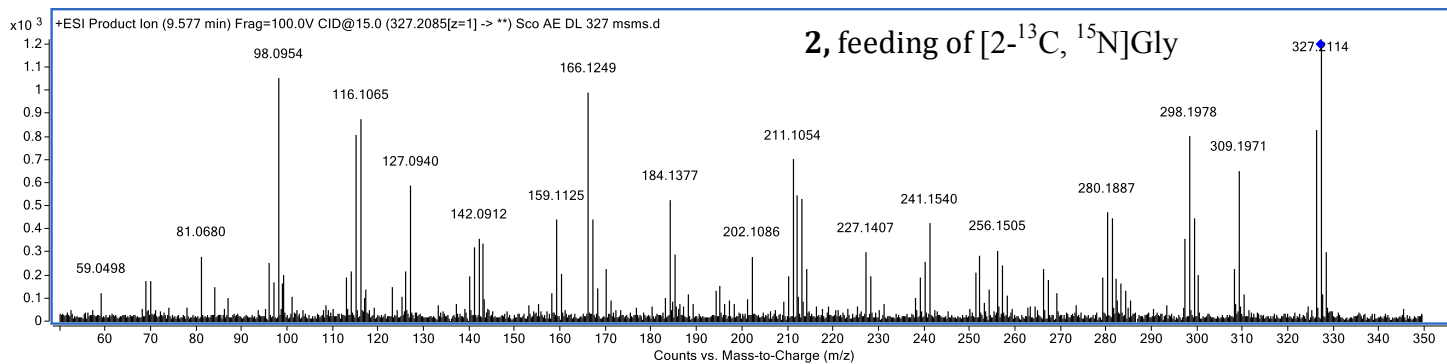

**Figure S3.** HRMS analysis of 1 and 2.

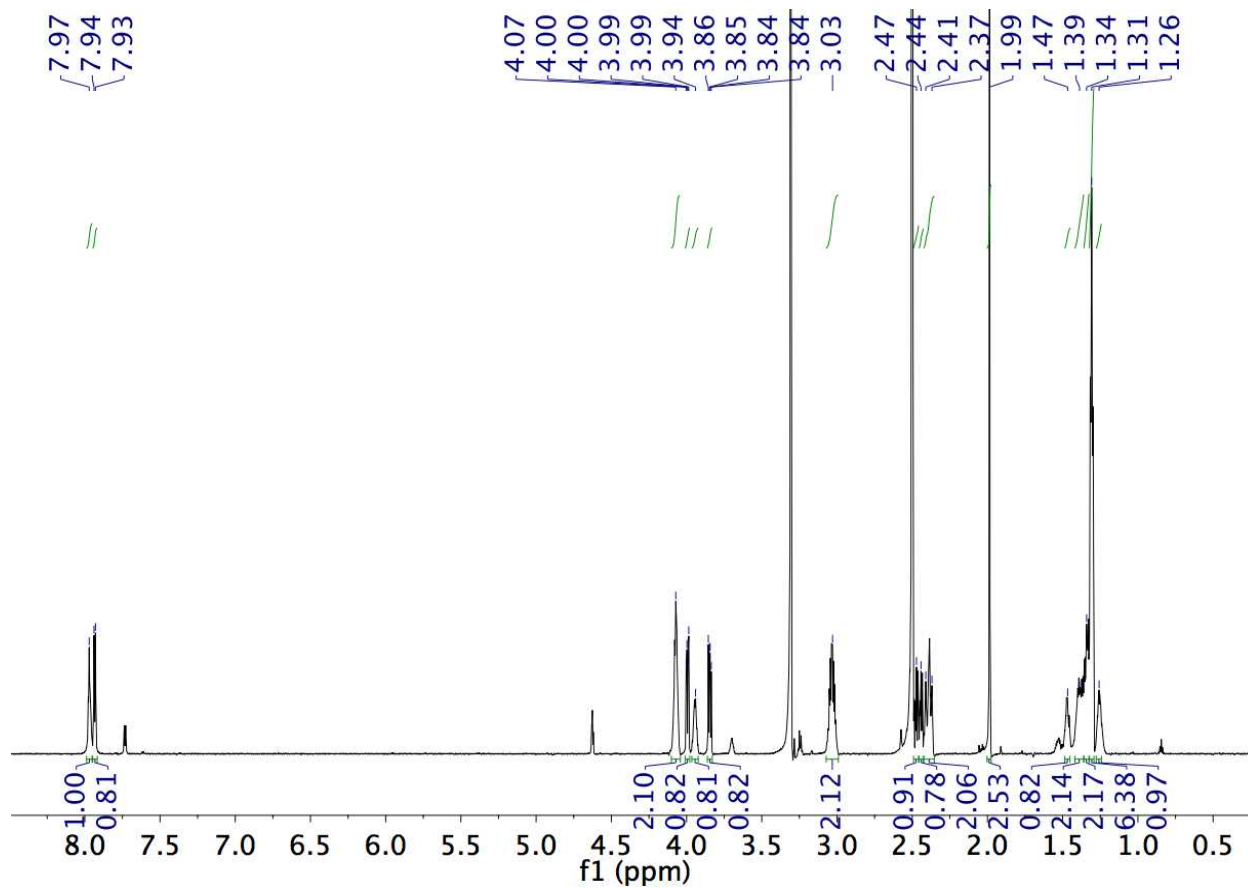

$^1\text{H}$  NMR spectrum (DMSO- $d_6$ , 900 MHz) of compound **1**.

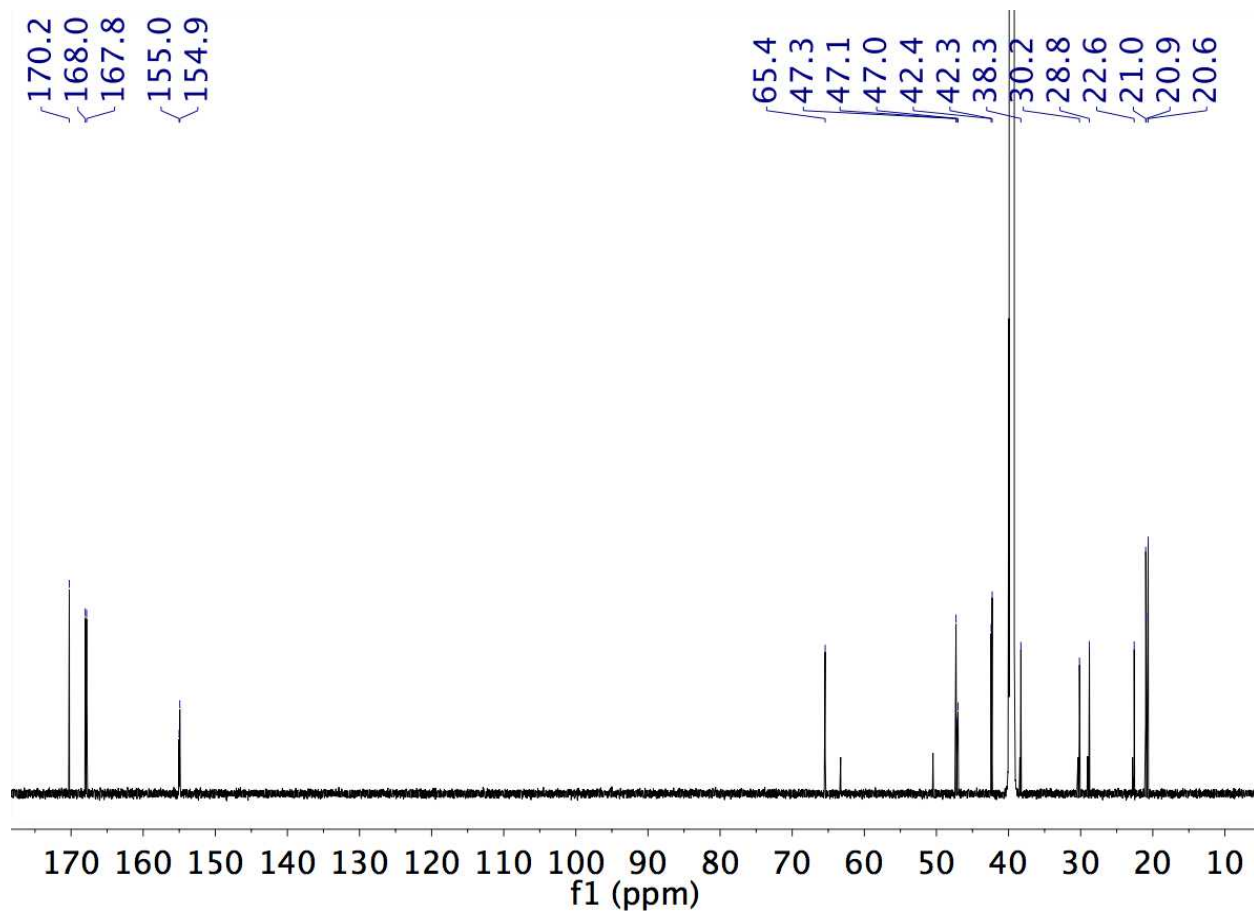

<sup>13</sup>C NMR spectrum (DMSO-d<sub>6</sub>, 225 MHz) of **1**

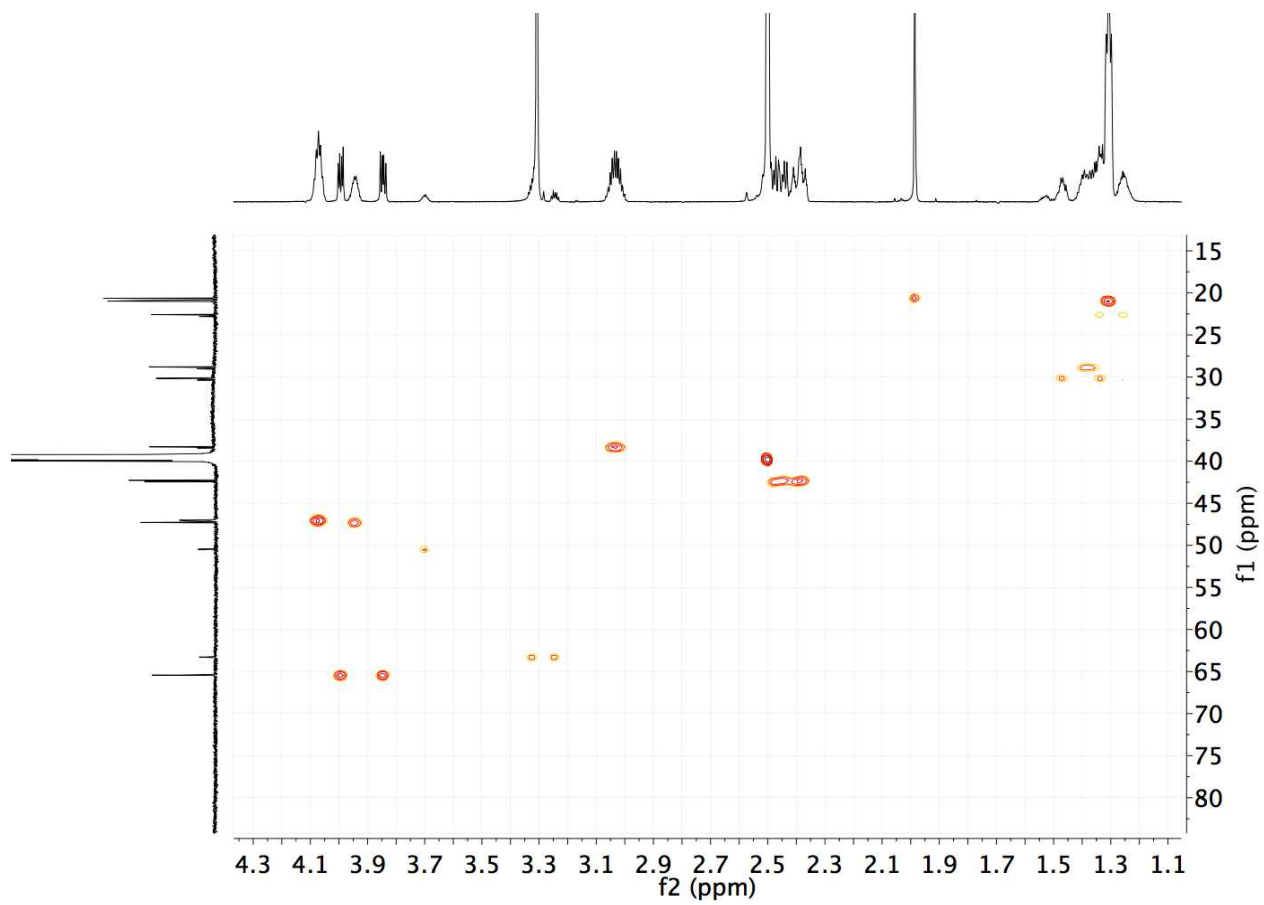

HSQC spectrum (DMSO- $d_6$ , 900 MHz) of **1**.

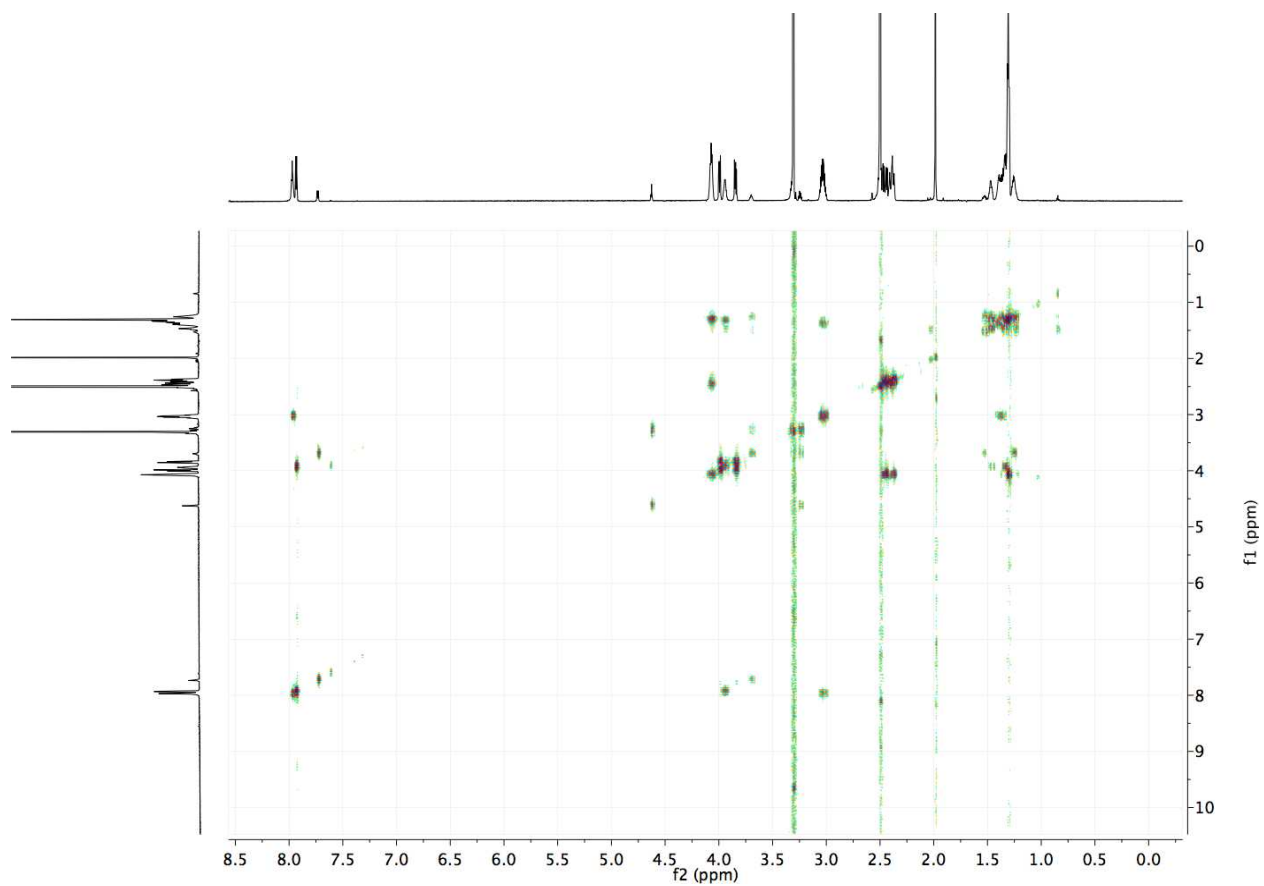

$^1\text{H}$ ,  $^1\text{H}$ -COSY spectrum (DMSO- $d_6$ , 900 MHz) of **1**.



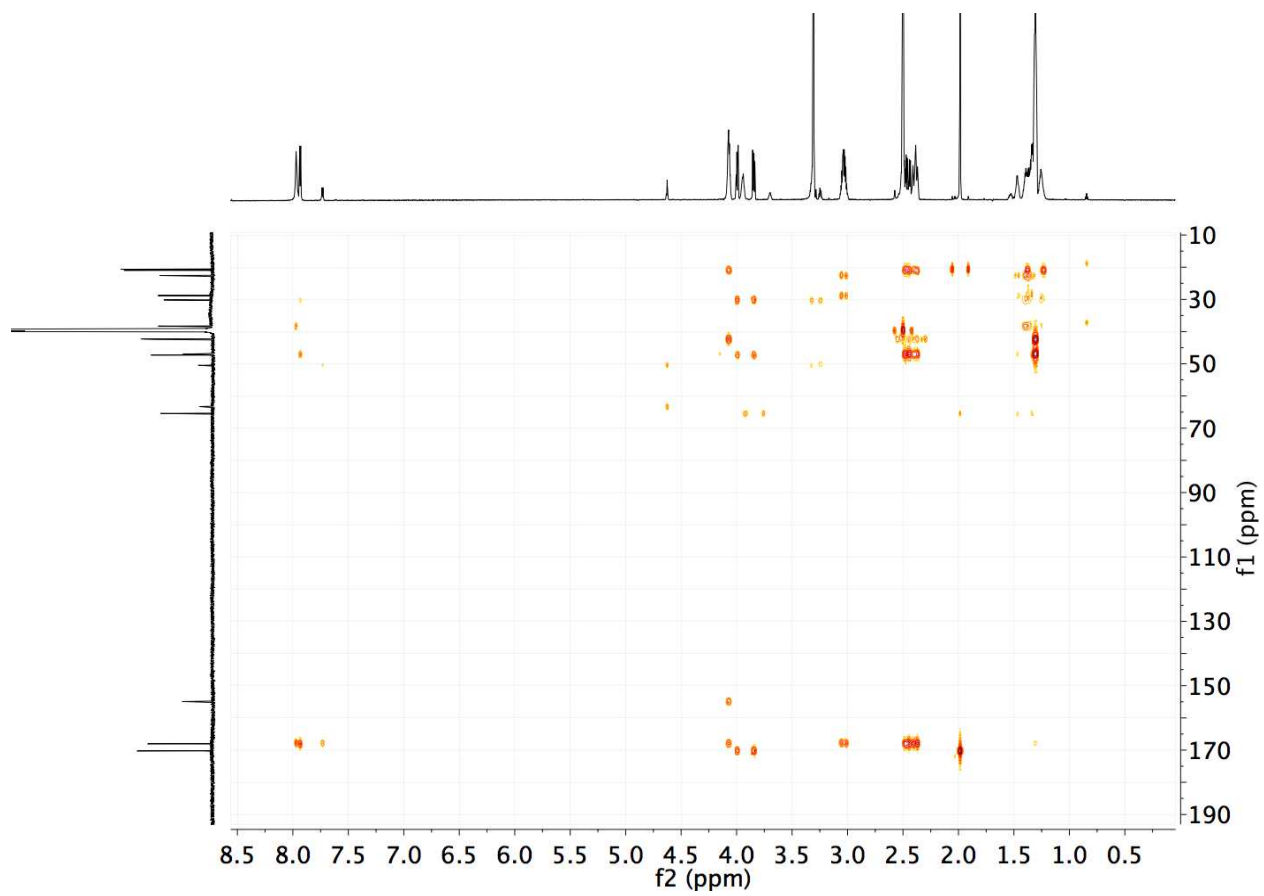

HMBC spectrum (DMSO-d<sub>6</sub>, 900 MHz) of **1**.

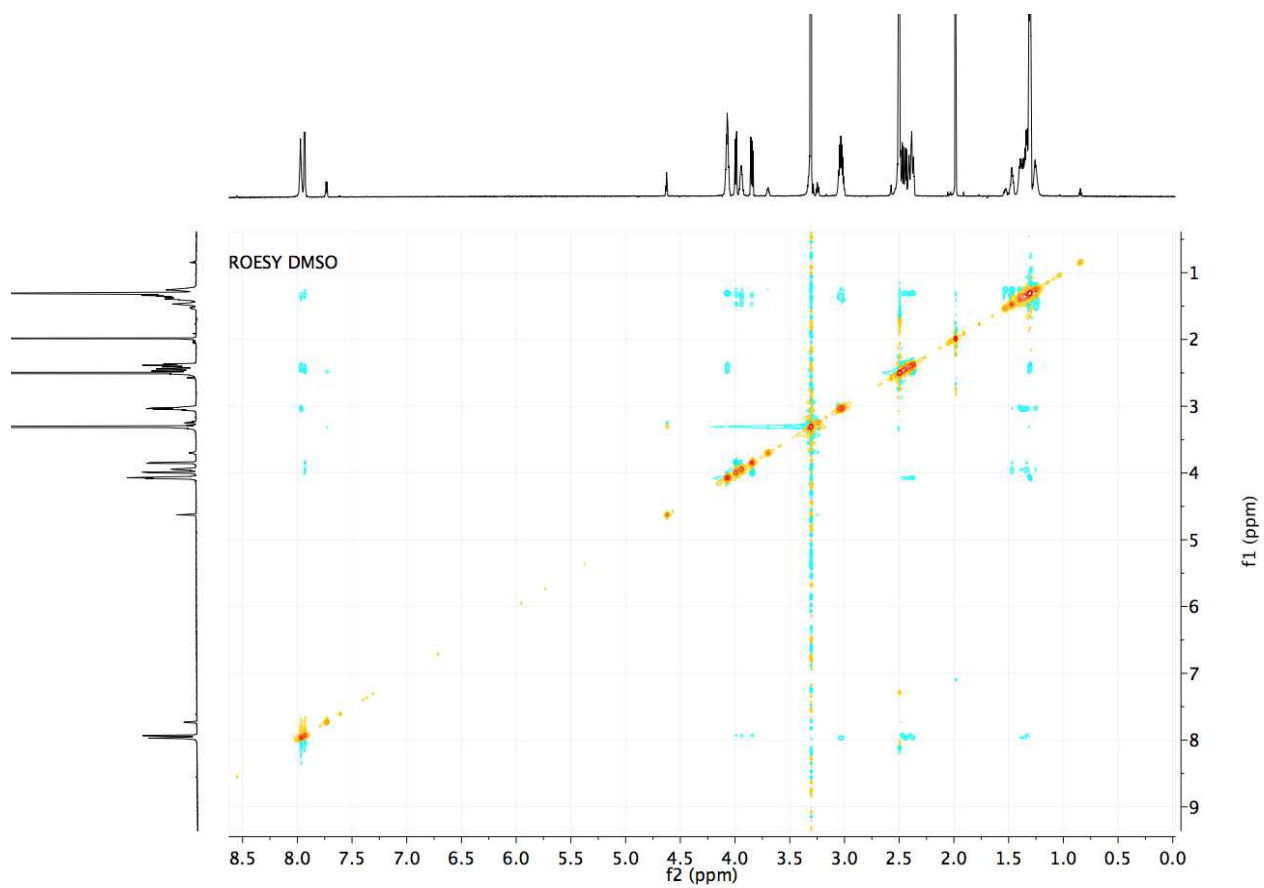

$^1\text{H}$ ,  $^1\text{H}$ -ROESY spectrum (DMSO- $d_6$ , 900 MHz) of **1**.

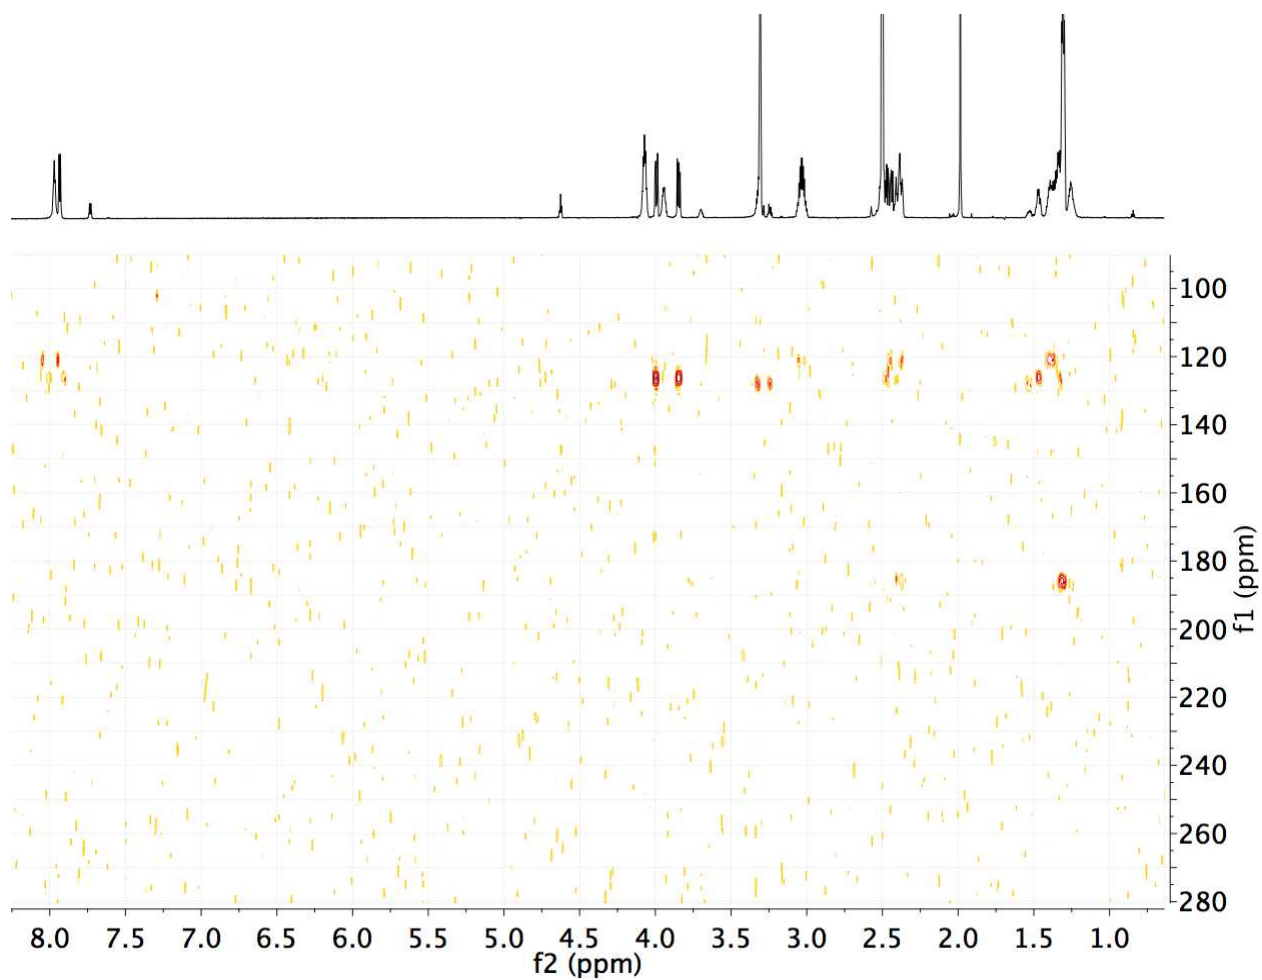

$^1\text{H}$ ,  $^{15}\text{N}$ -HMBC spectrum (DMSO- $d_6$ , 900 MHz) of **1**.

**Figure S4.** NMR spectra of compound **1**.

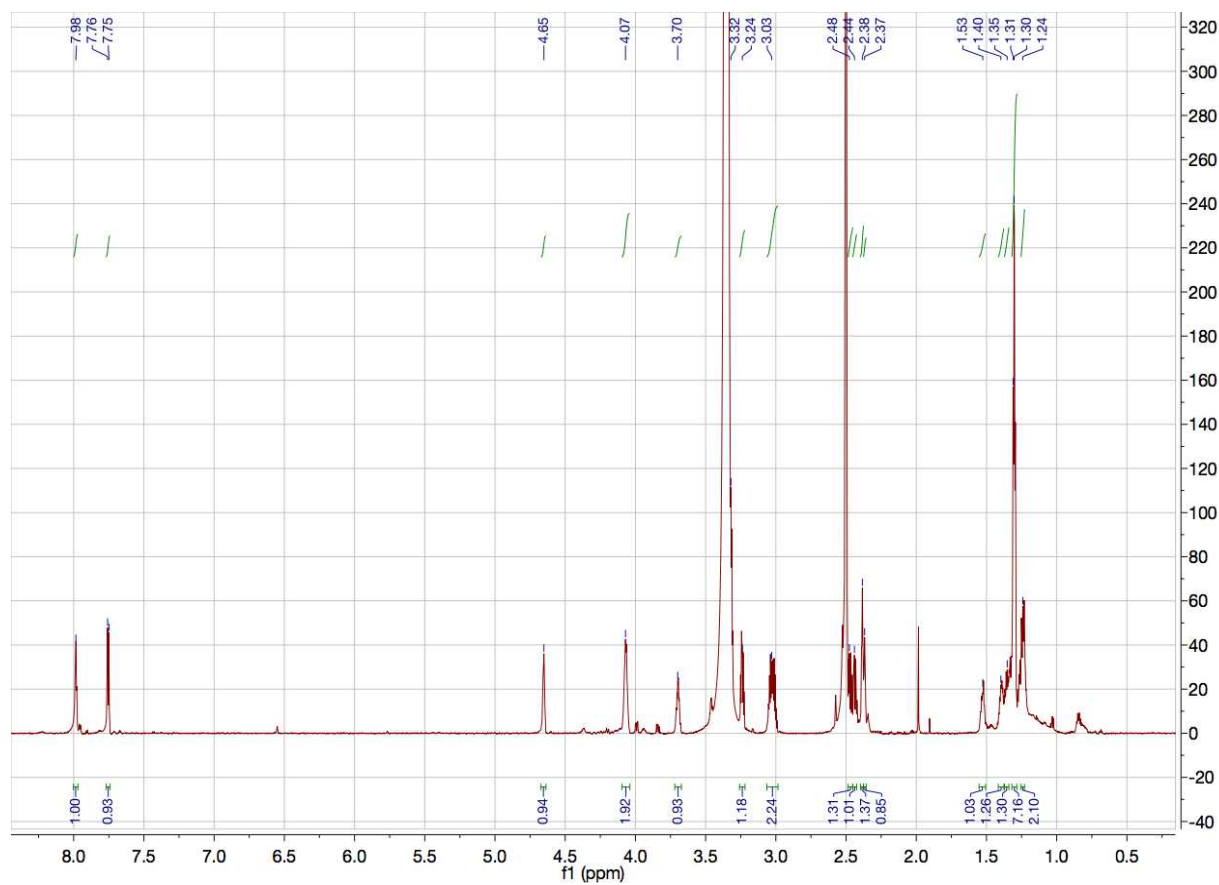

$^1\text{H}$  NMR spectrum ( $\text{DMSO-d}_6$ , 900 MHz) of **2**.

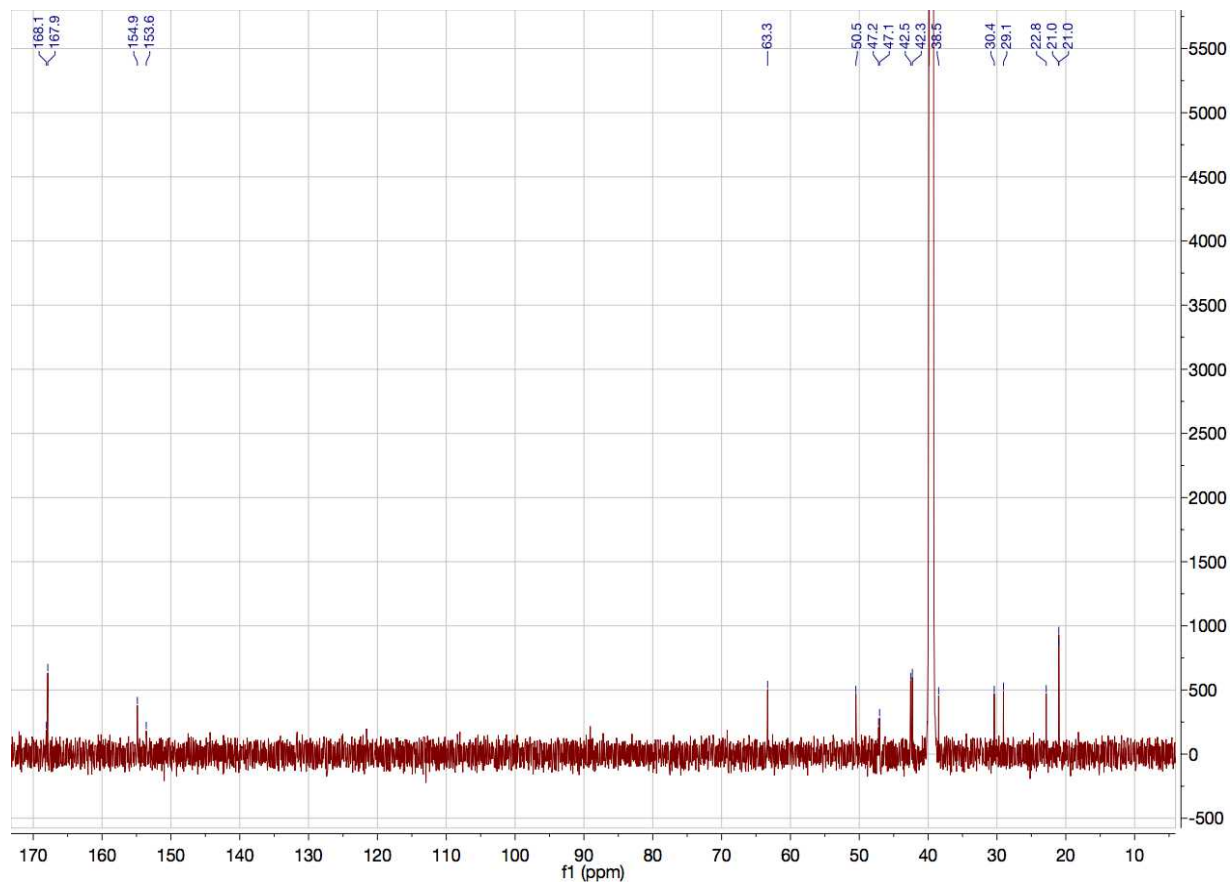

$^{13}\text{C}$  NMR spectrum ( $\text{DMSO-d}_6$ , 225 MHz) of **2**.

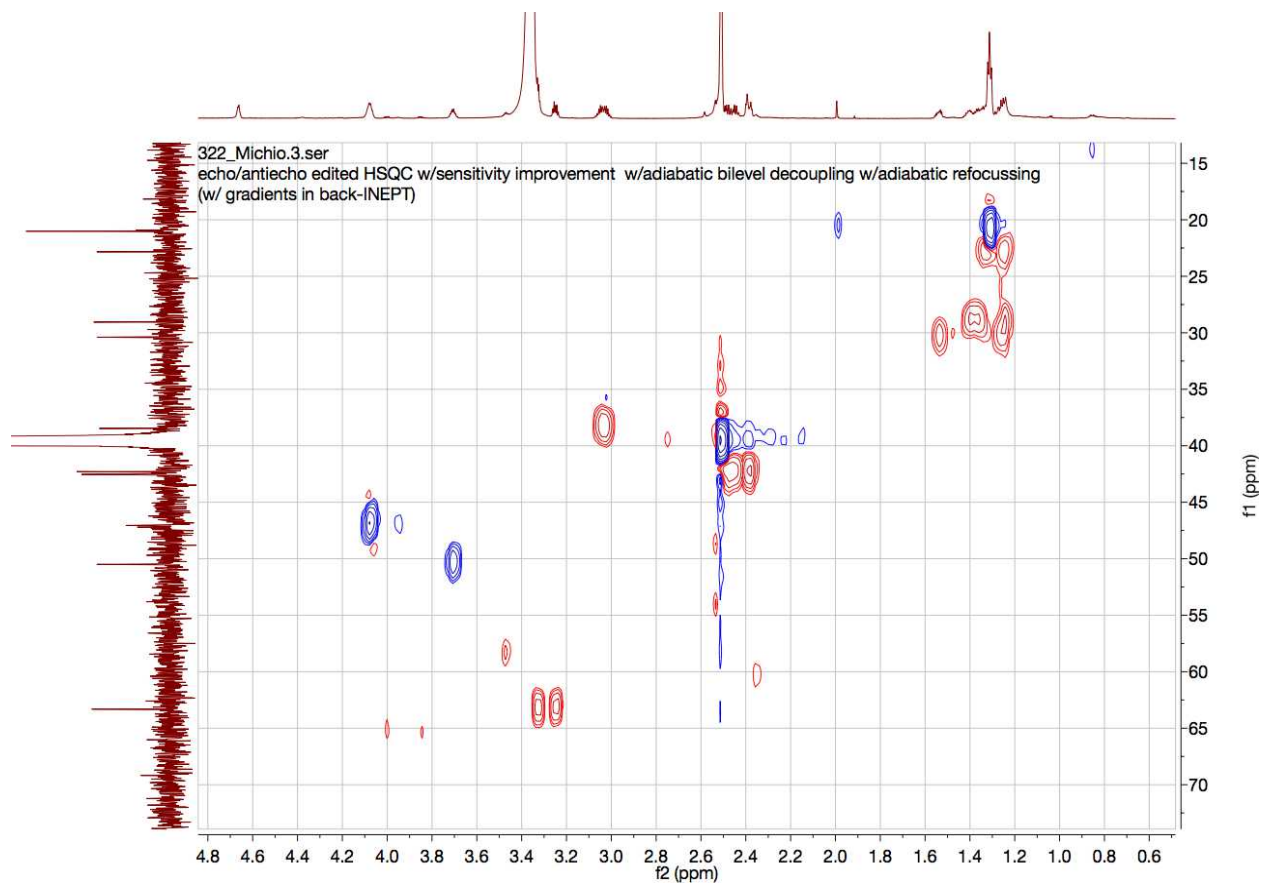

HSQC spectrum (DMSO- $d_6$ , 900 MHz) of **2**.

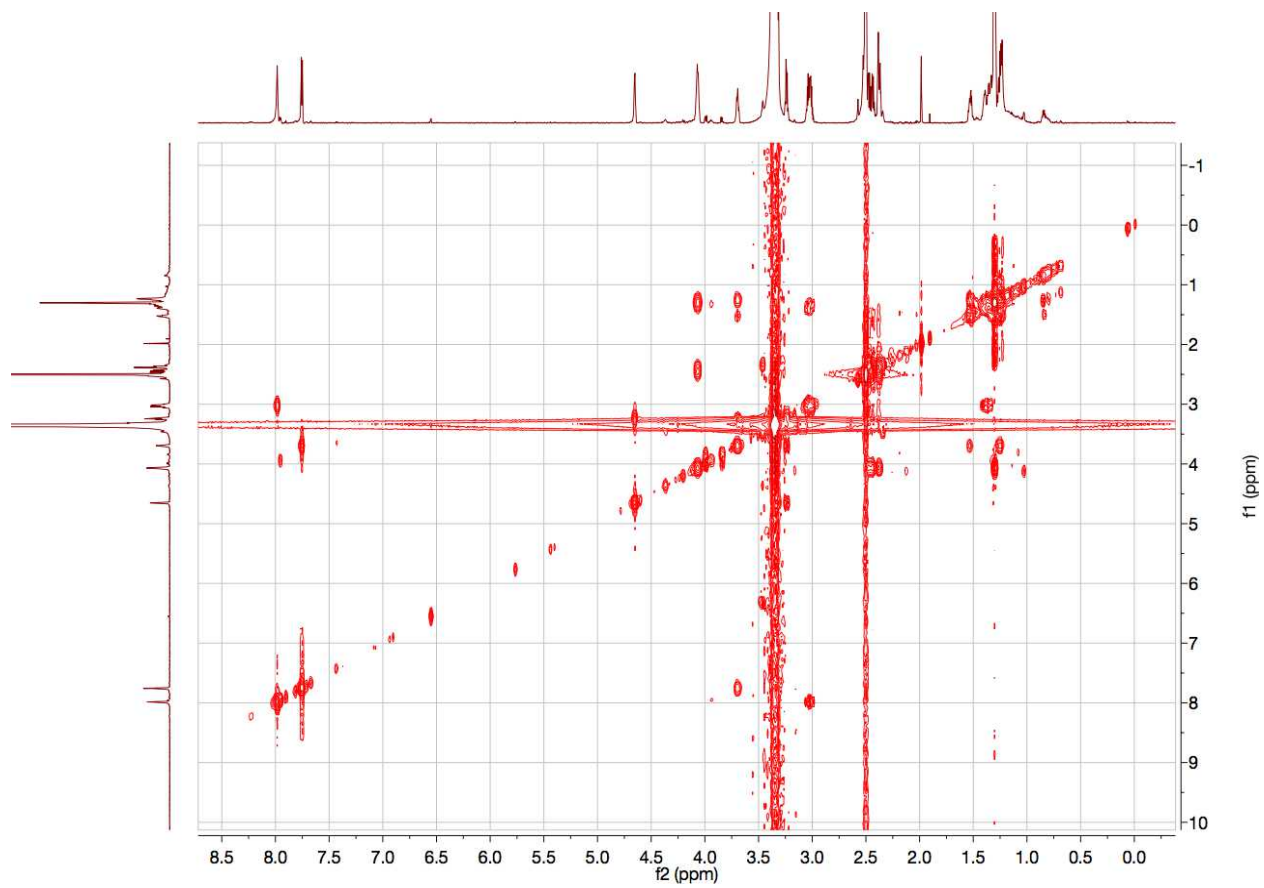

$^1\text{H}$ ,  $^1\text{H}$ -COSY spectrum (DMSO- $d_6$ , 900 MHz) of **2**.

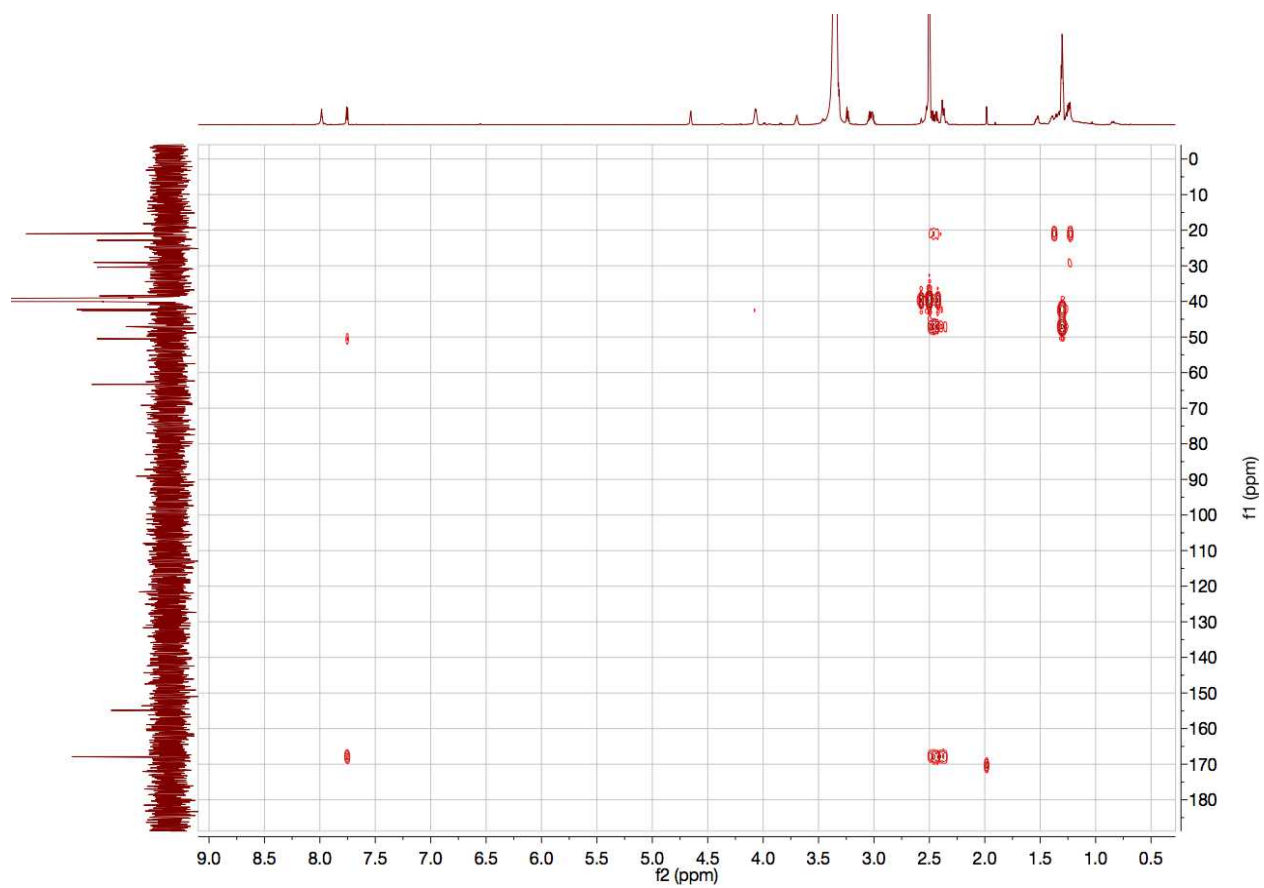

HMBC spectrum (DMSO-d<sub>6</sub>, 900 MHz) of **2**.

**Figure S5.** NMR spectra of compound **2**.



$m/z$   $[M+H]^+$   
Obs. 273.2173  
Calc. 273.2173  
Error: 0 ppm

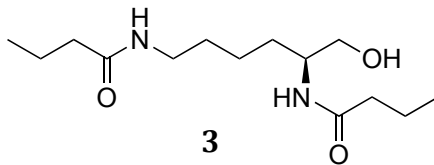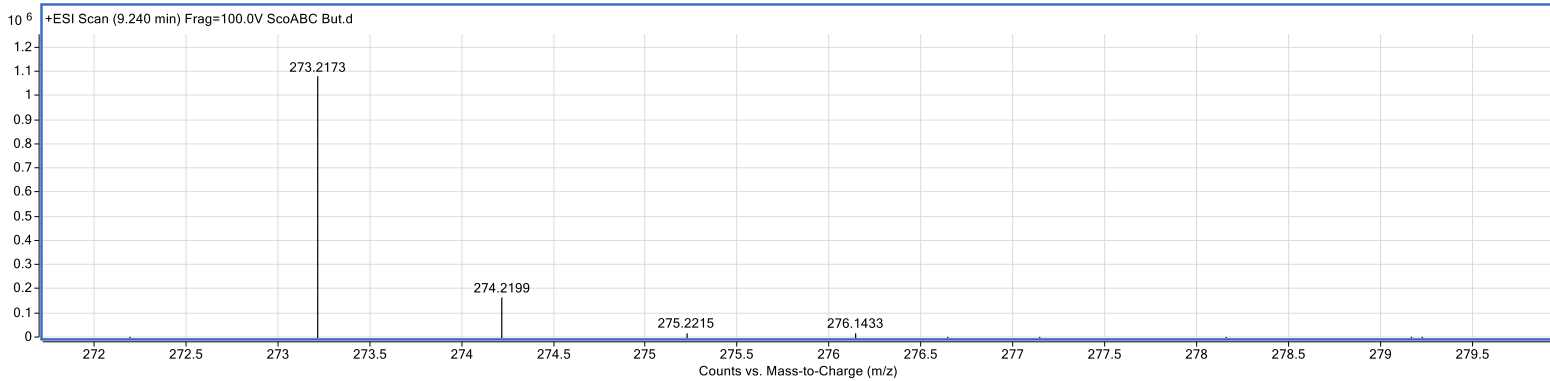

$m/z$   $[M+H]^+$   
Obs. 329.2805  
Calc. 329.2799  
Error: 1.8 ppm

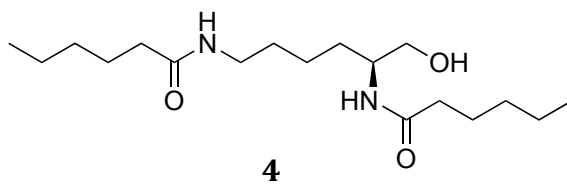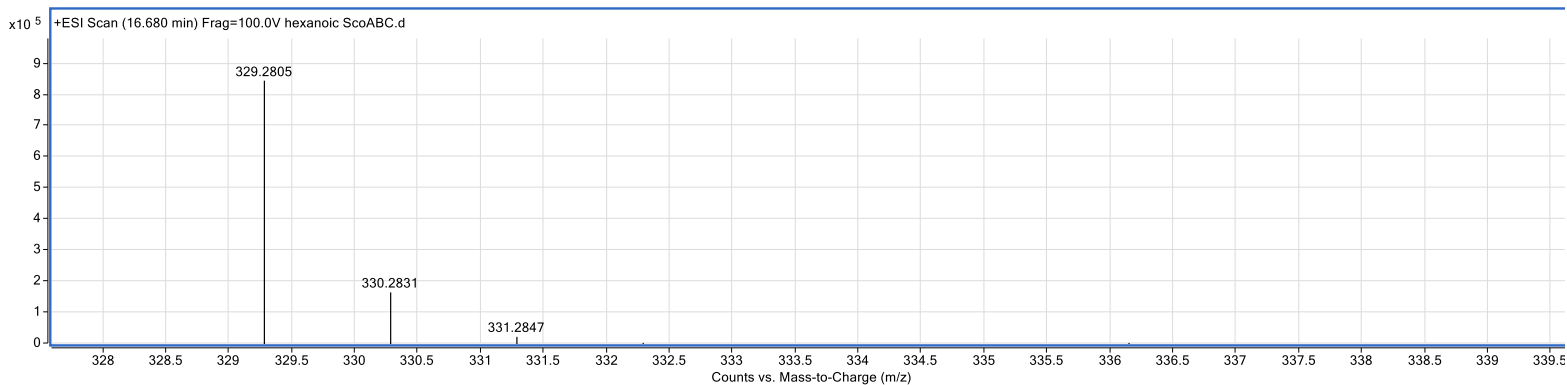

$m/z$   $[M+H]^+$   
Obs. 441.4051  
Calc. 441.4050  
Error: 0.2 ppm

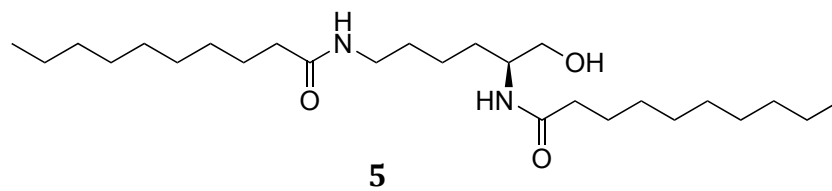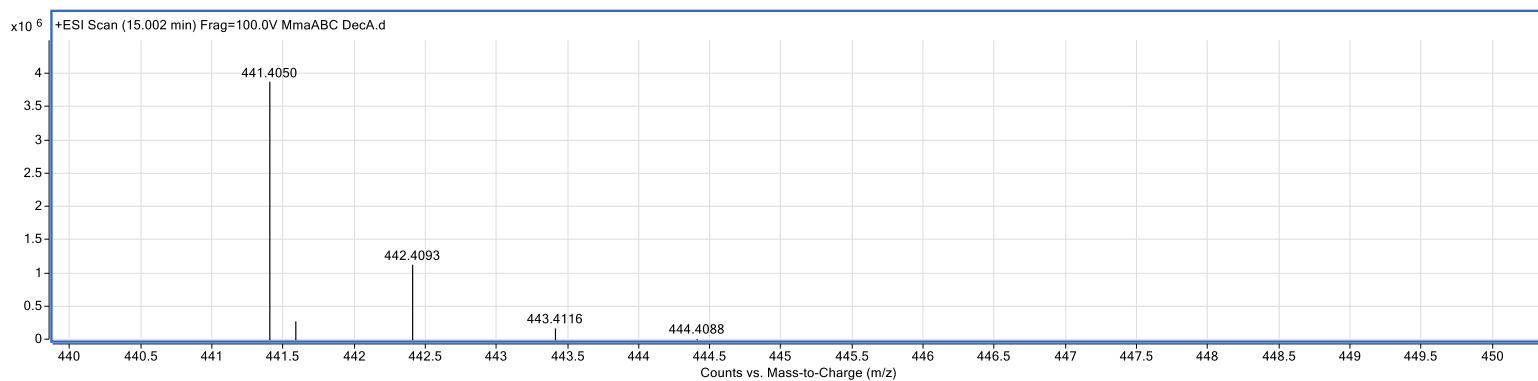

**Figure S6.** HRMS analysis of **3-5**.

$m/z$  [M+H]<sup>+</sup>  
Obs. 246.1701  
Calc. 246.1700  
Error: 0.4 ppm

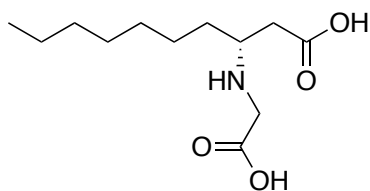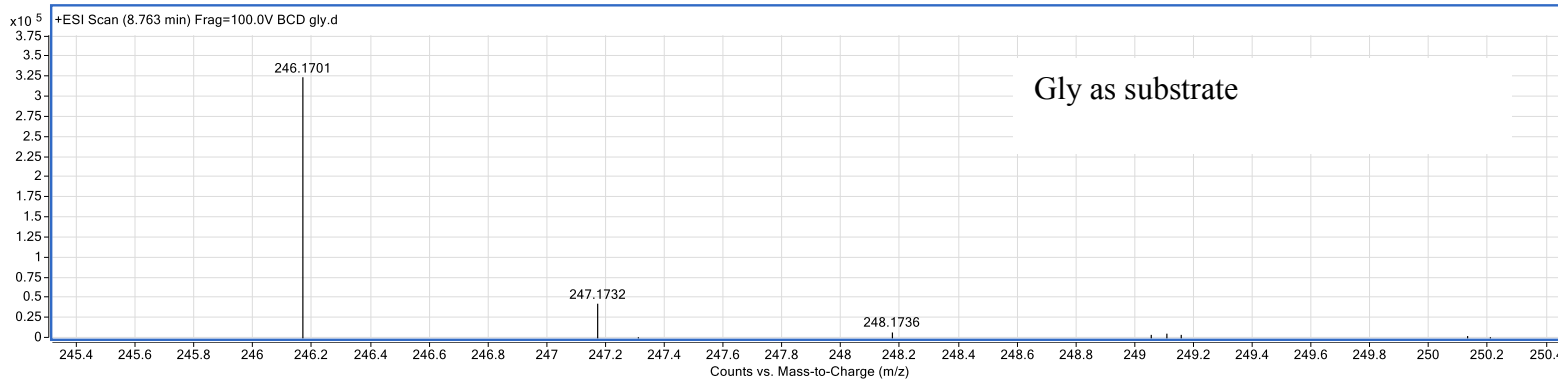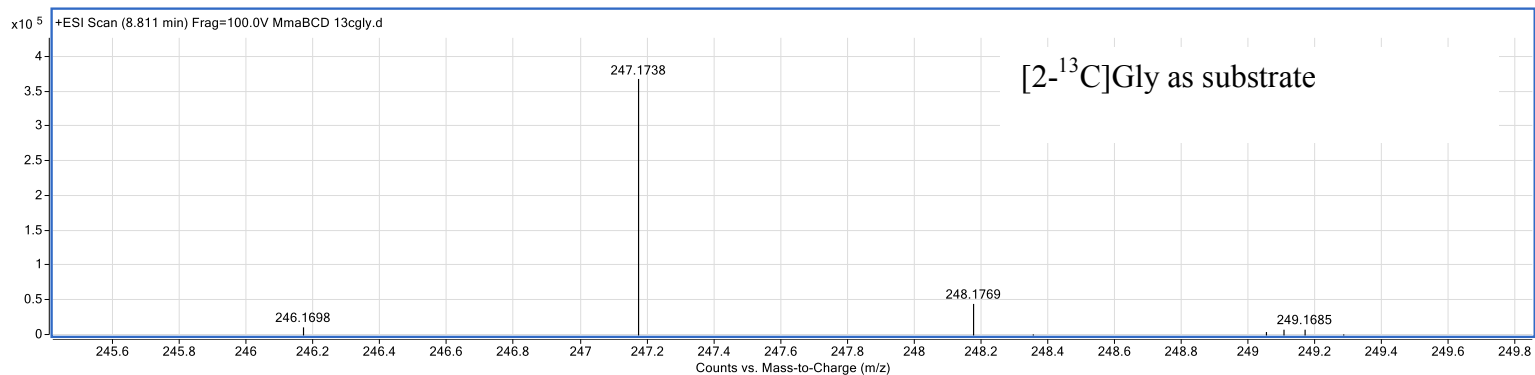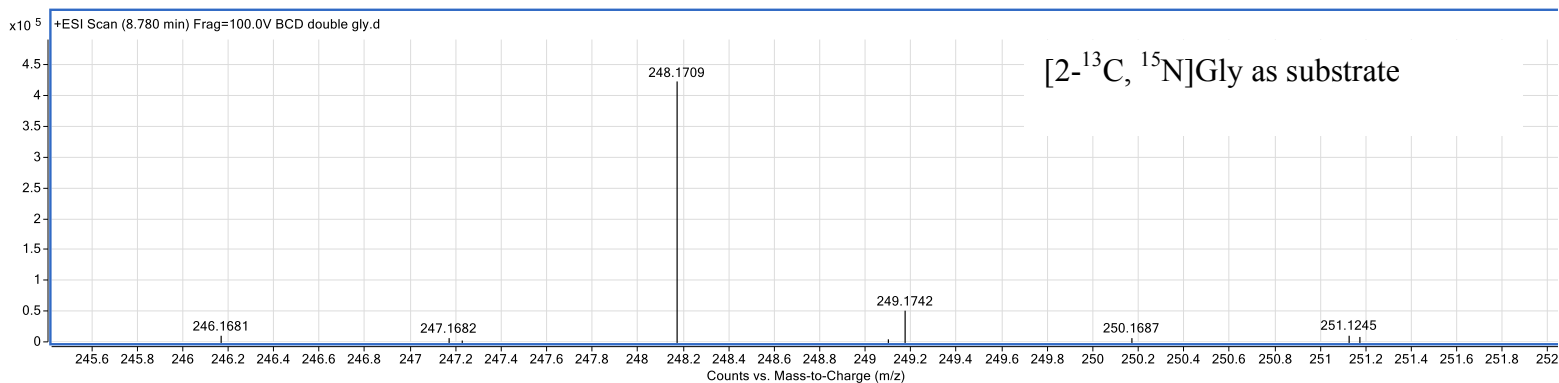

**Figure S7.** HRMS analysis of MmaBCD *in vitro* reaction products.

$m/z$   $[M+H]^+$   
Obs. 162.0772  
Calc. 162.0761  
Error: 6.7 ppm

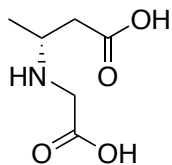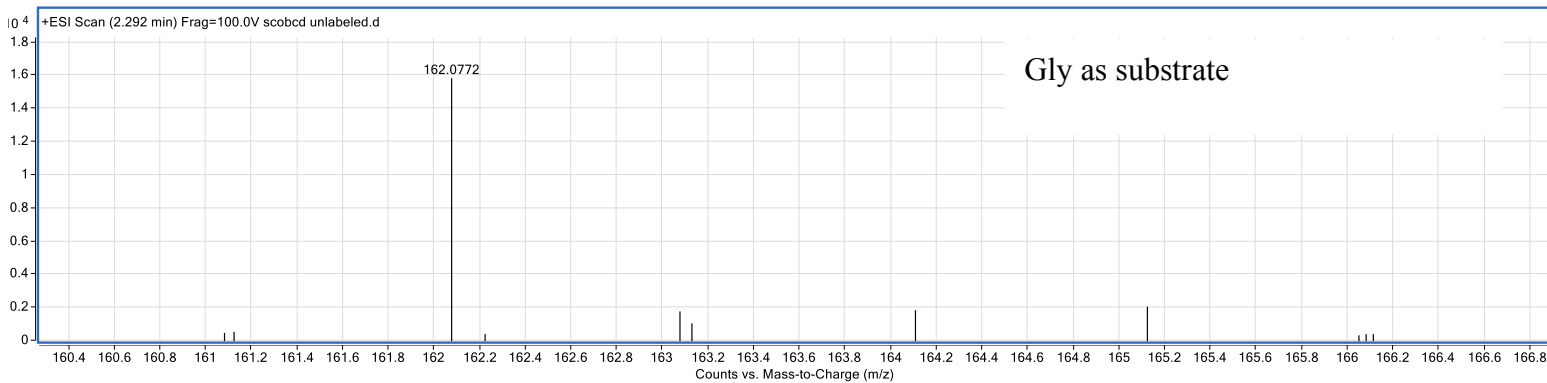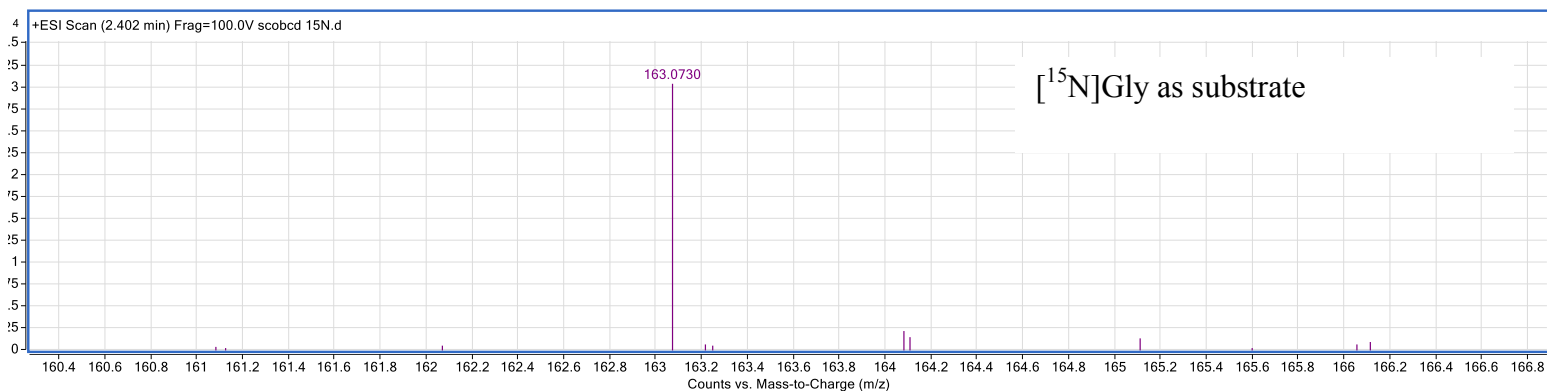

**Figure S8.** HRMS analysis of ScoBCD *in vitro* reaction products.

$m/z$   $[M+H]^+$   
Obs. 505.3748  
Calc. 505.3748  
Error: 0 ppm

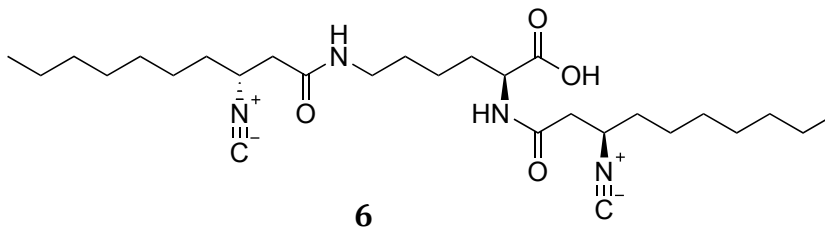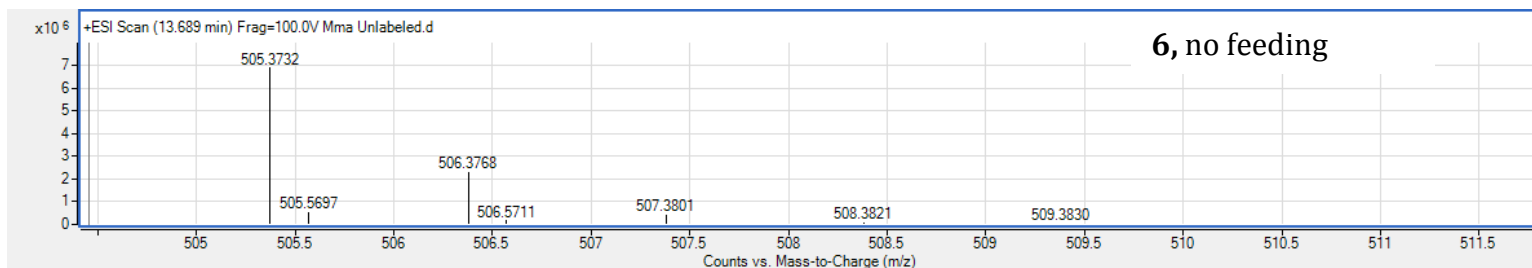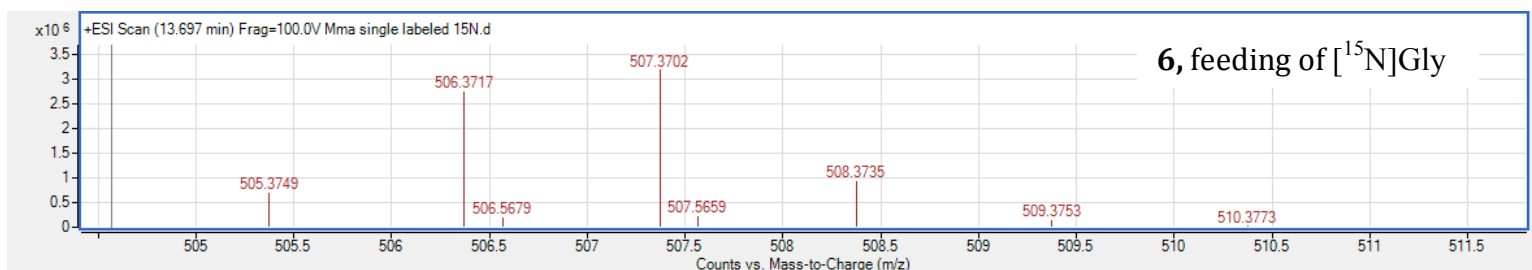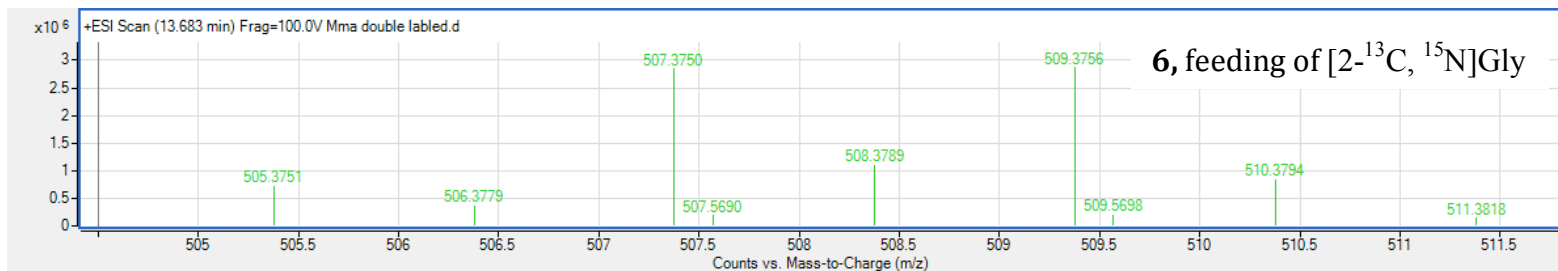

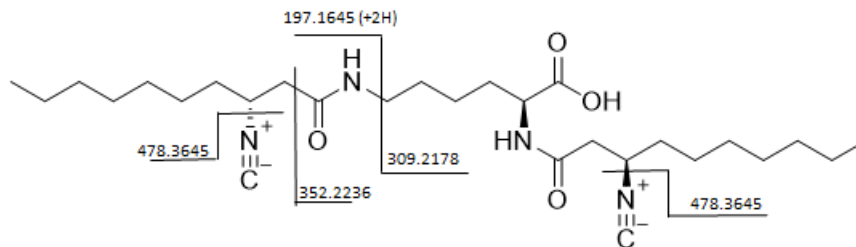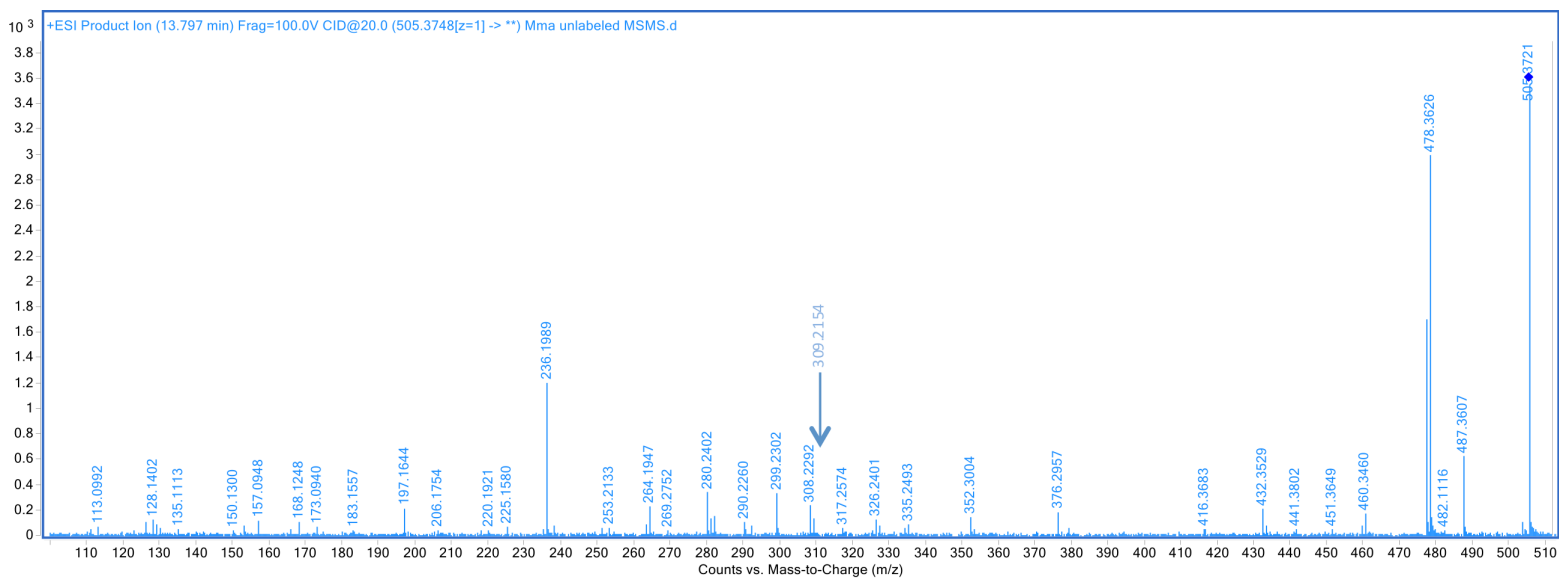

$m/z [M+H]^+$   
 Obs. 561.4376  
 Calc. 561.4374  
 Error: 0.4 ppm

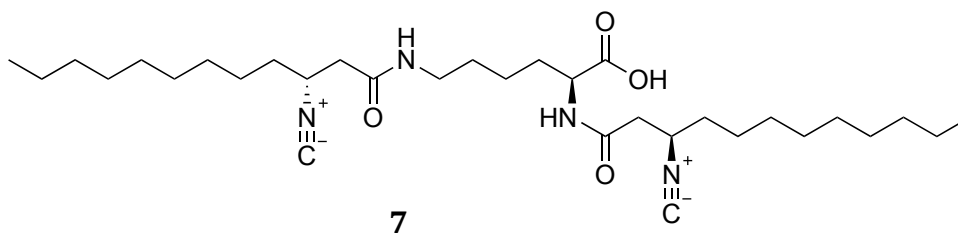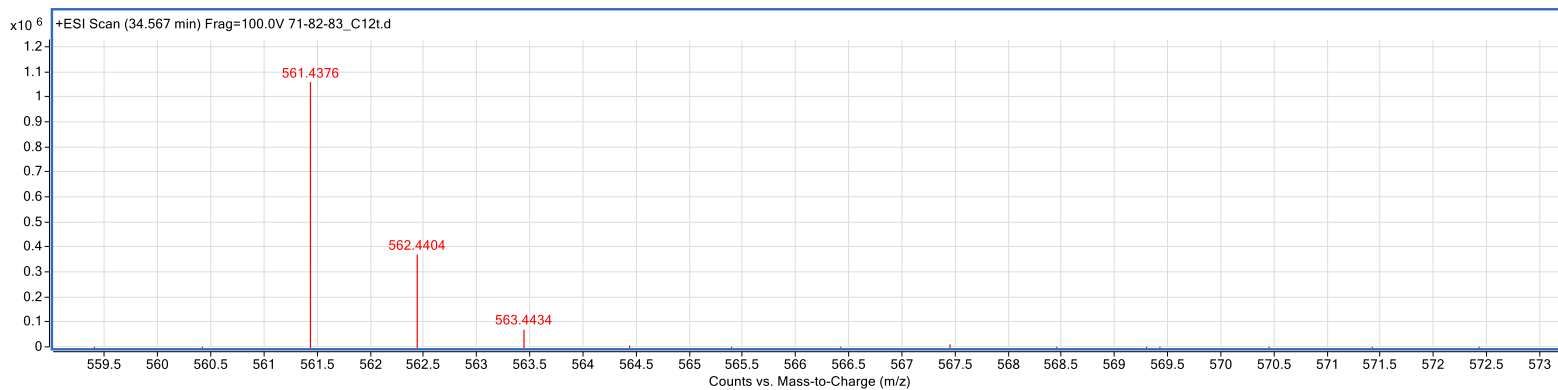

**Figure S9.** HRMS analysis of **6** and **7**.

## SI Tables

**Table S1.** NMR data for compound **1** in DMSO-d<sub>6</sub>.

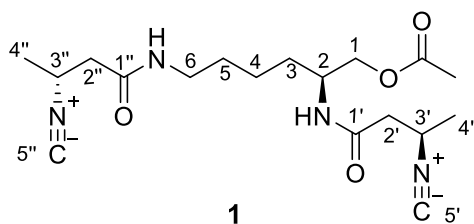

| Position | $\delta_H$ [ppm]  |    | mult. ( <i>J</i> in Hz) | $^1H$ - $^{13}C$ HMBC | $\delta_C$ [ppm] |
|----------|-------------------|----|-------------------------|-----------------------|------------------|
| 1        | 3.84              | 1H | dd (10.9, 6.5)          | 2,3,1-OAc(C)          | 65.4             |
|          | 3.99              | 1H | dd (10.9, 4.8)          |                       |                  |
| 2        | 3.94              | 1H | m                       | 1',3,4                | 47.3             |
| 3        | 1.47              | 1H | m                       | 1,2,4,5               | 30.2             |
|          | 1.34 <sup>a</sup> | 1H | m                       |                       |                  |
| 4        | 1.34 <sup>a</sup> | 1H | m                       | 3,6                   | 22.6             |
|          | 1.26              | 1H | m                       |                       |                  |
| 5        | 1.39              | 2H | m                       | 3,4,6                 | 28.8             |
| 6        | 3.03              | 2H | m                       | 1'',4,5               | 38.3             |
| 1'       |                   |    |                         |                       | 168.0            |
| 2'       | 2.41 <sup>b</sup> | 1H | m                       | 1',3',4'              | 42.4             |
|          | 2.47 <sup>c</sup> | 1H | m                       |                       |                  |
| 3'       | 4.07 <sup>d</sup> | 1H | m                       | 1',2',4',5'           | 47.1             |
| 4'       | 1.31 <sup>e</sup> | 3H | m                       | 1',2',3'              | 20.9             |
| 5'       |                   |    |                         |                       | 155.0            |
| 1''      |                   |    |                         |                       | 167.8            |
| 2''      | 2.37 <sup>b</sup> | 1H | m                       | 1'',3'',4''           | 42.3             |
|          | 2.44 <sup>c</sup> | 1H | m                       |                       |                  |
| 3''      | 4.07 <sup>d</sup> | 1H | m                       | 1'',2'',4'',5''       | 47.0             |
| 4''      | 1.31 <sup>e</sup> | 3H | m                       | 1'',2'',3''           | 21.0             |
| 5''      |                   |    |                         |                       | 154.9            |
| 1-OAc    |                   |    |                         |                       | 170.2            |
|          | 1.99              | 3H | s                       | 1, 1-OAc (C)          | 20.6             |
| 2-NH     | 7.93              | 1H | d (8.5)                 | 1,2,3,1',2',3''       |                  |
| 6-NH     | 7.97              | 1H | m                       | 5,6,1''               |                  |

<sup>a</sup>, <sup>b</sup>, <sup>c</sup>, <sup>d</sup>, <sup>e</sup>, overlapped signals.

**Table S2.** NMR data for compound **2** in DMSO-d<sub>6</sub>.

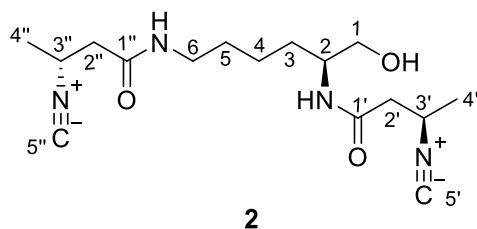

| Position | $\delta_{\text{H}}$ [ppm] |    | mult. ( <i>J</i> in Hz) | $^1\text{H}$ - $^{13}\text{C}$ HMBC | $\delta_{\text{C}}$ [ppm] |
|----------|---------------------------|----|-------------------------|-------------------------------------|---------------------------|
| 1        | 3.24                      | 1H | m                       |                                     | 63.3                      |
|          | 3.32                      | 1H | m                       |                                     |                           |
| 2        | 3.70                      | 1H | m                       |                                     | 50.5                      |
| 3        | 1.24 <sup>a</sup>         | 1H | m                       |                                     | 30.4                      |
|          | 1.53                      | 1H | m                       |                                     |                           |
| 4        | 1.24 <sup>a</sup>         | 1H | m                       | 3                                   | 22.8                      |
|          | 1.31 <sup>b</sup>         | 1H | m                       |                                     |                           |
| 5        | 1.35                      | 1H | m                       |                                     | 29.1                      |
|          | 1.40                      | 1H | m                       |                                     |                           |
| 6        | 3.03                      | 2H | m                       | 1'',4,5                             | 38.5                      |
| 1'       |                           |    |                         |                                     | 167.9                     |
| 2'       | 2.44                      | 1H | m                       | 3'                                  | 42.5                      |
|          | 2.48                      | 1H | m                       |                                     |                           |
| 3'       | 4.07 <sup>c</sup>         | 1H | m                       | 2', 4'                              | 47.2                      |
| 4'       | 1.30 <sup>b</sup>         | 3H | m                       | 2', 3'                              | 21.0                      |
| 5'       |                           |    |                         |                                     | 154.9                     |
| 1''      |                           |    |                         |                                     | 168.1                     |
| 2''      | 2.37                      | 1H | m                       | 3''                                 | 42.3                      |
|          | 2.38                      | 1H | m                       |                                     |                           |
| 3''      | 4.07 <sup>c</sup>         | 1H | m                       | 3''                                 | 47.1                      |
| 4''      | 1.30 <sup>b</sup>         | 3H | m                       | 3''                                 | 21.0                      |
| 5''      |                           |    |                         |                                     | 153.6                     |
| 1-OH     | 4.65                      | 1H | m                       |                                     |                           |
| 2-NH     | 7.76                      | 1H | d (8.5)                 | 1', 2                               |                           |
| 6-NH     | 7.98                      | 1H | m                       |                                     |                           |

<sup>a</sup>, <sup>b</sup>, overlapped signals.



**Table S3.** Primers used in this study.

| Primer            | Sequence (5' -> 3')                  |
|-------------------|--------------------------------------|
| Duet-mmar101-F    | aaagaattcgGTGACCGCGCCCGAAATCGG       |
| Duet-mmar101-R    | tataagcttCTAGGCCAGTGCGGGTCTTG        |
| pET24b-mmar100-F  | aaacataTGGCTGACCCGGTGCGCCA           |
| pET24b-mmar100-R  | aaactegagCGTAGGACTTTCAGTTCGG         |
| Duet-mmar99-F     | aaaggatccgATGTCCGACTTACCCGCTAC       |
| Duet-mmar99-R     | aaactgcagTCAGCCACCGGTTTGGACCT        |
| Duet-mmar98-F     | aaaggatccgatATGAGCACCACCGATTTGAC     |
| Duet-mmar98-R     | tataagcttcaattgCTAGGGGATGTTTCAGGGCCG |
| Duet-mmar97-F     | aaaggatccgATGACGCTCAACGTGAAAGG       |
| Duet-mmar97-R     | tataagcttTCATGCCGGGTAGCCCGGCG        |
| MmaNRPS-ETDuet-F  | aaactgcagGTGACCGCGCCCGAAATCGG        |
| MmaNRPS-ETDuet-R  | aaaaagcttCTAGGCCAGTGCGGGTCTTG        |
| MmaAAL-RSFDuet-F  | aaagaattcgATGTCCGACTTACCCGCTAC       |
| MmaAAL-RSFDuet-R  | aaaaagcttTCAGCCACCGGTTTGGACCT        |
| MmaACP-RSFDuet-F  | aaaaaaacatagCTGACCCGGTGCGCCA         |
| MmaACP-RSFDuet-R  | aaactegagCGTAGGACTTTCAGTTCGG         |
| MmaOXY-CDFDuet-F  | aaacatatgATGACGCTCAACGTGAAAGG        |
| MmaOXY-CDFDuet-R  | aaactgcagTCATGCCGGGTAGCCCGGCG        |
| MmaTE3-CDFDuet-F  | aaactgcagATGAGCACCACCGATTTGAC        |
| MmaTE3-CDFDuet-R  | aaaaagcttCTAGGGGATGTTTCAGGGCCG       |
| MmaTe3-ACYCDuet-F | aaactgcagATGAGCACCACCGATTTGAC        |
| MmaTe3-ACYCDuet-R | aaaaagcttCTAGGGGATGTTTCAGGGCCG       |
| AAL-RSFDuet-F     | aaagaattcgATGGACCGGCTCCACCACC        |
| AAL-RSFDuet-R     | aaaaagcttTCAGTTGACCTTGCCTGCGG        |
| ACP2-RSFDuet-F    | aaaaaacatagCTGCTCCCTCACGCT           |
| ACP2-RSFDuet-R    | aaactegagTCATGCCGGTGACATGGCCCG       |
| Oxy-CDFDuet-F     | aaacatatgATGCAGATCGACGAACAGCC        |
| Oxy-CDFDuet-R     | aaactegagTCATGCCGCCTGGATCCCGT        |
| TE3-CDFDuet-F     | aaactgcagATGACGGACGAAGCCCTGCT        |
| TE3-CDFDuet-R     | aaaaagcttTCAGGGGACGTTGACGAAGG        |
| NRPS-ETDuet-F     | aaactgcagATGTCACCGCATGACGACGC        |
| NRPS-ETDuet-R     | aaaaagcttCTACTTGGCGGGCATTGCCG        |
| TE3-ACYCDuet-F    | aaactgcagATGACGGACGAAGCCCTGCT        |
| TE3-ACYCDuet-R    | aaaaagcttTCAGGGGACGTTGACGAAGG        |
| Duet-sco101-F     | aaagaattcgATGTCACCGCATGACGACGC       |
| Duet-sco101-R     | tataagcttCTACTTGGCGGGCATTGCCG        |
| pET24b-sco100-F   | aaacataATGCCTGCTCCCTCACGCT           |
| pET24b-sco100-R   | aaactegagTCATGCCGGTGACATGGCCCG       |

|                  |                                                    |
|------------------|----------------------------------------------------|
| Duet-sco99-F     | aaagatccgATGGACCGGCTCCACCACCC                      |
| Duet-sco99-R     | aaactgcagTCAGTTGACCTTGCGTGCGG                      |
| Duet-sco98-F     | aaagatccgcatATGACGGACGAAGCCCTGCT                   |
| Duet-sco98-R     | tataagctcaattgTCAGGGGACGTTGACGAAGG                 |
| Duet-sco97-F     | aaagatccgATGCAGATCGACGAACAGCC                      |
| Duet-sco97-R     | tataagcttTCATGCCGCCTGGATCCCGT                      |
| pMSG360 Hyg-F    | ATCTGGATCCACGAAGCTTC                               |
| pMSG360 Hyg-R    | GGGGATCCTCTAGAGTCCTG                               |
| pMSG360 vector-F | GGGTACCTGAGAGCCTTCAA                               |
| pMSG360 vector-R | ATCCTGCAGGAATTCCTCGA                               |
| MmaE KO-F        | ggatttcggacaggactctagaggatccccGAGGCCGTCCCGTGCTTTGC |
| MmaE KO-R        | gctgactgggttgaaggctctcaggtacccACGCTCAACGTGAAAGGCGA |
| MmaA KO-F        | accgtacgtctcgaggaattctgcaggatCTAGGCCAGTGCGGGTCTTG  |
| MmaA KO-R        | gggccacatgaagctctggatccagatCGCGGTCCCTGATCAACTGC    |
